# Supplementary material for: Ultralight ultrafast enzymes
Source: Research Square preprint supplement (doi:10.21203/rs.3.rs-1103656/v1), 2021-12-15
Supplement: Supplementary file 1 [file ab42d013044c88162806e69a.xlsx]

## Sheet: Sheet1
Supplementary Table 1. Tm result of proteins in E.coli grown in Normal and Depleted M9 media.
Protein names	ID	Gene names	Tm_Depleted, average	Tm_Normal, average	p value
UPF0509 protein YciZ	A5A614	rpoS	48.7711	58.9965	0.0176937
6-phosphogluconate dehydrogenase, decarboxylating	P00350	ucpA	52.2493	59.0234	0.0996048
Fumarate reductase flavoprotein subunit	P00363	sspB	54.9825	61.5947	0.466708
NADP-specific glutamate dehydrogenase	P00370	tyrB	49.6978	55.6669	5.12374e-05
NADH dehydrogenase	P00393	ubiE	56.426	62.1523	0.0167028
Ribonucleoside-diphosphate reductase 1 subunit alpha	P00452;P00452-2	yqhD	54.1305	59.8342	0.00320418
Maltodextrin phosphorylase	P00490	mrp	58.8946	64.1465	0.00013196
Aspartate aminotransferase	P00509	nrdF	48.4812	53.6076	0.0131996
Bifunctional aspartokinase/homoserine dehydrogenase 1;Aspartokinase;Homoserine dehydrogenase	P00561	bepA	55.6191	60.7432	1.28306e-05
Bifunctional aspartokinase/homoserine dehydrogenase 2;Aspartokinase;Homoserine dehydrogenase	P00562	uspF	53.398	58.5122	0.0429608
RNA polymerase sigma factor RpoD	P00579	tnaA	57.8649	62.9196	0.00192222
DNA polymerase I	P00582	rffA	59.2318	64.2837	0.00994208
Beta-lactamase	P00811	ftsZ	53.1074	58.06	0.00217253
Diaminopimelate decarboxylase	P00861	ibpB	55.5612	60.4544	0.253022
Phosphoenolpyruvate carboxylase	P00864	gpmB	60.183	64.7674	0.02075
Phospho-2-dehydro-3-deoxyheptonate aldolase, Trp-sensitive	P00887	argA	47.6316	52.1976	0.0904299
Phospho-2-dehydro-3-deoxyheptonate aldolase, Tyr-sensitive	P00888	uxaC	47.3011	51.8315	0.00611858
Acetolactate synthase isozyme 2 large subunit	P00892	rpsJ	55.8925	60.1774	0.00506165
Acetolactate synthase isozyme 3 large subunit	P00893	xylF	59.0033	63.2714	0.0777401
Acetolactate synthase isozyme 3 small subunit	P00894	ribF	49.5577	53.7296	0.249803
Anthranilate synthase component 1	P00895	yeiR	51.0645	55.2264	0.0508255
Aminodeoxychorismate synthase component 2	P00903	ompF	51.7843	55.83	0.46201
Bifunctional protein TrpGD;Anthranilate synthase component 2;Anthranilate phosphoribosyltransferase	P00904	gyrB	50.9915	54.8014	0.0362676
Tryptophan biosynthesis protein TrpCF;Indole-3-glycerol phosphate synthase;N-(5-phospho-ribosyl)anthranilate isomerase	P00909	ribB	53.3343	57.1111	0.00189059
Deoxyribodipyrimidine photo-lyase	P00914	uidA	56.2661	60.0346	0.0995538
D-serine dehydratase	P00926	yaeH	61.2273	64.9813	0.171563
Threonine synthase	P00934	pstB	58.7409	62.4944	0.0695188
Xylose isomerase	P00944	hinT	61.5368	65.1427	0.0113004
Mannose-6-phosphate isomerase	P00946	secA	46.0507	49.5864	0.0238837
Tryptophan--tRNA ligase	P00954	trmA	55.8629	59.3639	0.166399
Isoleucine--tRNA ligase	P00956	parC	53.8498	57.2649	0.0022203
Alanine--tRNA ligase	P00957	uxuA	57.8093	61.1943	0.000597902
Methionine--tRNA ligase	P00959	ycgL	59.5746	62.9146	0.273695
Glycine--tRNA ligase alpha subunit	P00960	sgrR	48.3727	51.6926	0.0164985
Glycine--tRNA ligase beta subunit	P00961	tig	55.9936	59.3069	1.60525e-05
Glutamine--tRNA ligase	P00962	typA	48.8115	51.9969	0.00027419
Aspartate--ammonia ligase	P00963	qorB	56.0791	59.2141	0.00845834
Carbamoyl-phosphate synthase large chain	P00968	gmhB	61.4415	64.5706	0.0198011
30S ribosomal protein S7	P02359	clpX	52.1195	55.2206	0.000549494
50S ribosomal protein L15	P02413	dnaK	62.0185	65.1043	0.000176576
Penicillin-binding protein 1B;Penicillin-insensitive transglycosylase;Penicillin-sensitive transpeptidase	P02919-2;P02919	epmA	50.8133	53.8613	0.110882
L-arabinose-binding periplasmic protein	P02924	dnaB	52.3353	55.3555	0.000990573
Outer membrane protein TolC	P02930	basR	50.8627	53.8526	0.0708845
Outer membrane protein F	P02931	hybD	52.6818	55.6584	0.0170434
Lactose operon repressor	P03023	surE	58.7167	61.6811	0.319609
Transcriptional activator protein LysR	P03030	efp	53.6112	56.5603	0.00050309
Maltose operon periplasmic protein	P03841	hycI	59.3118	62.222	0.107081
GMP synthase [glutamine-hydrolyzing]	P04079	fadD	54.6081	57.5066	0.0253628
Esterase FrsA	P04335	ycbX	59.91	62.8059	0.419366
Aromatic-amino-acid aminotransferase	P04693	cca	49.3292	52.2208	0.0234091
Glutamate--tRNA ligase	P04805	rarA	47.5961	50.3839	0.00129854
Leucine-specific-binding protein	P04816	ybaA	62.4548	65.2285	0.178548
Aminopeptidase N	P04825	obgE	52.2639	54.9808	0.0344662
Lipoprotein 28	P04846	tus	52.4962	55.2063	0.284732
L-threonine dehydratase biosynthetic IlvA	P04968	rsmH	54.4322	57.1207	0.00417235
Exodeoxyribonuclease 7 large subunit	P04994	cusB	57.9025	60.5869	0.0256704
Exodeoxyribonuclease I	P04995	mazG	62.3988	65.0724	0.0095473
Aminodeoxychorismate synthase component 1	P05041	luxS	62.4574	65.0048	0.0366419
Fumarate hydratase class II	P05042	mprA	60.0049	62.5164	0.00395916
Polyribonucleotide nucleotidyltransferase	P05055	nlpA	51.2183	53.7295	0.0971984
3-dehydroquinate dehydratase	P05194	entC	60.056	62.521	0.542405
Protease 3	P05458	mnmE	58.0153	60.4789	0.00114248
Erythronate-4-phosphate dehydrogenase	P05459	aspA	60.4682	62.9278	0.0722639
Formamidopyrimidine-DNA glycosylase	P05523	gloA	47.2568	49.7	0.104119
Bis(5-nucleosyl)-tetraphosphatase [symmetrical]	P05637	yraJ	58.7855	61.2104	0.150922
Glucitol/sorbitol-specific phosphotransferase enzyme IIA component	P05706	nrdE	46.579	48.9731	0.0495736
Dihydroxy-acid dehydratase	P05791	ettA	47.5279	49.9014	0.000755273
Ketol-acid reductoisomerase	P05793	wecF	52.4615	54.798	0.123127
Beta-glucuronidase	P05804	yhgF	51.4272	53.7474	0.00353355
Ferrienterobactin receptor	P05825	deoR	59.9042	62.2176	0.00265839
HTH-type transcriptional regulator IlvY	P05827	udk	60.9711	63.2843	0.153903
tRNA N6-adenosine threonylcarbamoyltransferase	P05852	acs	54.9537	57.2435	0.000533836
D-lactate dehydrogenase	P06149	rbfA	63.8152	66.0905	0.0471567
Vitamin B12 transport periplasmic protein BtuE	P06610	rpsK	51.8906	54.1621	0.0706416
DNA topoisomerase 1	P06612	dnaJ	52.1275	54.3911	0.0840997
Bifunctional ligase/repressor BirA	P06709	mntR	58.1038	60.3522	0.469991
DNA polymerase III subunit tau	P06710;P06710-2	pyrI	64.3212	66.5632	0.00608016
Multifunctional CCA protein;CCA-adding enzyme;2-nucleotidase;2,3-cyclic phosphodiesterase;Phosphatase	P06961	yibT	62.0532	64.2623	0.211608
Ferrichrome-iron receptor	P06971	blc	53.8732	56.0818	0.145585
Histidinol-phosphate aminotransferase	P06986	hisI	64.2464	66.4462	0.0160257
Histidine biosynthesis bifunctional protein HisB;Histidinol-phosphatase;Imidazoleglycerol-phosphate dehydratase	P06987	ybjS	53.9441	56.114	0.0862536
Histidine biosynthesis bifunctional protein HisIE;Phosphoribosyl-AMP cyclohydrolase;Phosphoribosyl-ATP pyrophosphatase	P06989	yecJ	61.1481	63.3032	0.0268577
Ribosomal RNA small subunit methyltransferase A	P06992	yajQ	61.4546	63.5938	0.00183279
Lysophospholipase L2	P07000	rpsN	52.4114	54.5501	0.00189642
Pyruvate dehydrogenase [ubiquinone];Alpha-peptide	P07003	gpmI	56.2867	58.4238	0.00477374
Peptide chain release factor 2	P07012	ddpA	50.6189	52.7468	0.00222546
Primosomal replication protein n	P07013	glnE	53.0684	55.1931	0.536281
Succinate dehydrogenase iron-sulfur subunit	P07014	iap	48.2763	50.3824	0.00451436
T-protein;Chorismate mutase;Prephenate dehydrogenase	P07023	rplU	46.0298	48.1309	0.0937218
Periplasmic AppA protein;Phosphoanhydride phosphohydrolase;4-phytase	P07102	rpoA	62.6267	64.7193	0.003083
Histidine transport ATP-binding protein HisP	P07109	rlmG	53.858	55.94	0.0079686
Valine--tRNA ligase	P07118	hslU	49.6775	51.7497	0.0958795
Phenylalanine--tRNA ligase beta subunit	P07395	uxaB	54.4819	56.5239	0.494914
Transcriptional regulatory protein TyrR	P07604	rpsA	62.3715	64.3817	0.00218408
Homoserine O-succinyltransferase	P07623	srlB	62.6207	64.6191	0.230136
3-dehydroquinate synthase	P07639	araF	56.177	58.1693	0.0805571
RecBCD enzyme subunit RecC	P07648	parE	58.3635	60.3411	0.452602
tRNA pseudouridine synthase A	P07649	der	52.5405	54.5086	0.150917
Thymidine phosphorylase	P07650	deoB	50.8592	52.8232	0.00398959
1,4-alpha-glucan branching enzyme GlgB	P07762	rnt	53.9333	55.8968	0.113376
Leucine--tRNA ligase	P07813	yhcB	53.0528	54.995	0.573434
Iron(3+)-hydroxamate import ATP-binding protein FhuC	P07821	fklB	54.6857	56.6226	0.0847498
D-alanine--D-alanine ligase B	P07862	pcnB	55.0167	56.9351	0.00255079
L-threonine 3-dehydrogenase	P07913	dcrB	53.1015	54.9944	0.672735
Acetolactate synthase isozyme 1 large subunit	P08142	sspA	60.4747	62.3653	0.00104008
Phosphoribosylformylglycinamidine cyclo-ligase	P08178	rplP	53.8089	55.6989	0.00275854
Phosphoribosylglycinamide formyltransferase	P08179	rpsB	52.1698	54.0468	0.0346825
Bifunctional protein FolC;Folylpolyglutamate synthase;Dihydrofolate synthase	P08192	rplY	63.7084	65.5838	0.0981463
Isocitrate dehydrogenase [NADP]	P08200	rdgC	54.3901	56.2599	0.00497974
L-arabinose isomerase	P08202	pheA	54.4003	56.2643	0.139676
Ribulokinase	P08204	rppH	55.6351	57.483	0.675725
Orotidine 5-phosphate decarboxylase	P08244	ribC	59.9547	61.7907	0.0435947
Phenylalanine--tRNA ligase alpha subunit	P08312	fmt	52.2845	54.119	0.011038
2,3-cyclic-nucleotide 2-phosphodiesterase/3-nucleotidase	P08331	ffh	54.8311	56.6615	0.00847242
Transcriptional regulatory protein CreB	P08368	fbaA	59.7619	61.5888	0.00440572
UDP-N-acetylenolpyruvoylglucosamine reductase	P08373	gppA	50.3263	52.1499	0.000268127
USG-1 protein	P08390	rplF	50.5627	52.3744	0.000400401
RecBCD enzyme subunit RecB	P08394	argR	59.2255	61.0348	0.0549075
D-alanyl-D-alanine carboxypeptidase DacC	P08506	rstA	49.7006	51.5083	0.230306
Chaperone protein DnaJ	P08622	rsmI	56.1312	57.9271	0.000108974
Lysine-sensitive aspartokinase 3	P08660	rpsI	52.0381	53.8329	0.115876
NA	P08839	yfeX	53.9443	55.7222	0.328563
Type I restriction enzyme EcoKI R protein	P08956	murQ	51.5415	53.3187	0.0762901
Malate synthase A	P08997	yaiL	62.8232	64.5965	0.114523
Exodeoxyribonuclease III	P09030	acrA	50.3232	52.0744	0.575739
Valine--pyruvate aminotransferase	P09053	nfsB	55.5814	57.3232	0.0134253
Uroporphyrinogen-III synthase	P09126	aroG	52.482	54.2213	0.0149347
2-isopropylmalate synthase	P09151	cmk	53.8148	55.5539	0.226429
Polyamine aminopropyltransferase	P09158	mfd	46.9423	48.6784	0.00017239
PTS system N-acetylglucosamine-specific EIICBA component;N-acetylglucosamine permease IIC component;N-acetylglucosamine-specific phosphotransferase enzyme IIB component;N-acetylglucosamine-specific phosphotransferase enzyme IIA component	P09323	rpmD	55.5345	57.2679	0.0104891
NA	P09372	rph	57.8359	59.5287	0.117771
Formate acetyltransferase 1	P09373	bfr	57.5782	59.2638	0.0605073
Glycerophosphoryl diester phosphodiesterase	P09394	eno	59.4361	61.1189	0.000868482
Mannitol-1-phosphate 5-dehydrogenase	P09424	sucC	58.3423	60.0242	0.00537008
Lysine/arginine/ornithine-binding periplasmic protein	P09551	cbpA	58.8168	60.488	0.0410962
Glutamate synthase [NADPH] large chain	P09831	yniA	49.4151	51.0798	0.640067
NA	P09832	yafC	59.6579	61.3067	0.0117462
UvrABC system protein A	P0A698	lpxD	51.5529	53.1859	0.00198671
Acetate kinase	P0A6A3	hisB	54.1986	55.8304	0.0435787
3-isopropylmalate dehydratase large subunit	P0A6A6	msrA	53.8451	55.4767	0.449814
Alanine racemase, biosynthetic	P0A6B4	tsaE	61.9177	63.5461	0.0264755
Cysteine desulfurase IscS	P0A6B7	metQ	52.6063	54.2285	0.706606
Amino-acid acetyltransferase	P0A6C5	rlmJ	56.9619	58.5821	0.228327
Acetylglutamate kinase	P0A6C8	sdaA	55.6471	57.2646	0.0547266
Arginine repressor	P0A6D0	ftsI	52.7809	54.3941	0.0359853
3-phosphoshikimate 1-carboxyvinyltransferase	P0A6D3	yhdE	56.421	58.0247	0.0622373
Shikimate kinase 1	P0A6D7	yjgM	58.3012	59.8931	0.217697
Argininosuccinate synthase	P0A6E4	rplI	55.5709	57.1624	0.00289415
Carbamoyl-phosphate synthase small chain	P0A6F1	deoC	62.3077	63.8913	0.184085
Glycerol kinase	P0A6F3	tolC	50.8216	52.4044	0.303482
ATP-dependent Clp protease ATP-binding subunit ClpX	P0A6H1	malM	61.7682	63.3494	0.0495943
ATP-dependent protease ATPase subunit HslU	P0A6H5	coaBC	59.554	61.1124	0.163507
Cytidylate kinase	P0A6I0	rapA	51.1219	52.6702	0.401547
Pantothenate kinase	P0A6I3	gpsA	57.18	58.7212	0.134564
Dephospho-CoA kinase	P0A6I9	kdgK	57.6492	59.1867	0.626326
D-amino acid dehydrogenase	P0A6J5	yedY	49.7015	51.2275	0.806021
D-alanine--D-alanine ligase A	P0A6J8	thyA	62.6417	64.167	0.0678937
Diaminopimelate epimerase	P0A6K1	panC	52.608	54.1296	0.00568233
Phosphopentomutase	P0A6K6	mrr	51.8543	53.3725	0.0577737
Deoxyribose-phosphate aldolase	P0A6L0	ycaK	56.5	58.011	0.0224032
4-hydroxy-tetrahydrodipicolinate synthase	P0A6L2	pyrG	53.409	54.9133	0.00154535
Altronate oxidoreductase	P0A6L7	pssA	52.4117	53.9157	0.0584785
Elongation factor G	P0A6M8	pyrD	56.9217	58.4211	0.617455
Elongation factor P	P0A6N4	aroK	63.4533	64.9438	0.0250474
Elongation factor P-like protein	P0A6N8	slyA	60.9402	62.4114	0.00473954
GTPase Der	P0A6P5	aaeR	58.3507	59.8211	0.147031
Probable GTP-binding protein EngB	P0A6P7	yccU	62.3215	63.7863	0.0261926
Enolase	P0A6P9	gcvT	57.5528	59.0035	0.140946
3-hydroxydecanoyl-[acyl-carrier-protein] dehydratase	P0A6Q3	rpmB	51.7065	53.1566	0.353404
3-oxoacyl-[acyl-carrier-protein] synthase 3	P0A6R0	cyoA	55.9126	57.3545	0.450927
Glycerol-3-phosphate dehydrogenase [NAD(P)+]	P0A6S7	hisC	62.5265	63.963	0.0761511
NA	P0A6T1	hflX	54.0472	55.4721	0.0927198
tRNA uridine 5-carboxymethylaminomethyl modification enzyme MnmG	P0A6U3	proQ	59.4441	60.8594	0.0426268
Thiosulfate sulfurtransferase GlpE	P0A6V5	dacB	54.165	55.5707	0.168313
Glucokinase	P0A6V8	nusB	60.7521	62.1532	0.0205764
Glutamate--cysteine ligase	P0A6W9	adk	59.3312	60.7298	0.0902208
33 kDa chaperonin	P0A6Y5	glyQ	53.4948	54.8611	0.00901223
Chaperone protein DnaK	P0A6Y8	ynjB	53.8441	55.1951	0.132183
Chaperone protein HscA	P0A6Z1	rplN	47.6678	49.0097	0.11378
Chaperone protein HtpG	P0A6Z3	betB	58.7618	60.0865	0.0630579
Translation initiation factor IF-2	P0A705	rplB	46.6297	47.9534	0.0398304
2-dehydro-3-deoxyphosphooctonate aldolase	P0A715	murE	61.0149	62.3361	0.0183299
Thymidylate kinase	P0A720	glyS	51.5228	52.8289	0.0561982
UDP-3-O-[3-hydroxymyristoyl] N-acetylglucosamine deacetylase	P0A725	xerD	54.799	56.1034	0.294331
Maf-like protein YceF	P0A729	mdoB	51.2857	52.5857	0.201253
Large-conductance mechanosensitive channel	P0A742	ygbI	54.2864	55.5781	0.0356024
Peptide methionine sulfoxide reductase MsrA	P0A744	rplD	57.095	58.377	0.05364
UDP-N-acetylglucosamine 1-carboxyvinyltransferase	P0A749	acrR	61.2375	62.5178	0.107831
Glutathione-regulated potassium-efflux system ancillary protein KefG	P0A756	yegP	60.3104	61.5712	0.0220642
Glucosamine-6-phosphate deaminase	P0A759	tsaD	56.3035	57.5394	0.266
Putative N-acetylmannosamine-6-phosphate 2-epimerase	P0A761	nagA	55.5947	56.8224	0.0229126
Nucleoside diphosphate kinase	P0A763	minD	54.8398	56.0638	0.351744
RNA pyrophosphohydrolase	P0A776	rpsQ	56.4732	57.6879	0.167677
N utilization substance protein B	P0A780	truA	53.0184	54.2183	0.0711523
Oligoribonuclease	P0A784	ppc	55.0275	56.2254	0.0052717
Pyridoxine 5-phosphate synthase	P0A794	ybaK	62.7308	63.9211	0.0292053
ATP-dependent 6-phosphofructokinase isozyme 1	P0A796	pqqL	50.7811	51.9686	0.0219148
Phosphoglycerate kinase	P0A799	ppx	52.0475	53.2149	0.00838072
Probable phosphoglycerate mutase GpmB	P0A7A2	prfB	58.2285	59.3939	0.00866796
Protein-L-isoaspartate O-methyltransferase	P0A7A5	pepB	54.3499	55.5036	0.0395541
Glycerol-3-phosphate acyltransferase	P0A7A7	dnaX	48.5456	49.6881	0.208839
Polyphosphate kinase	P0A7B1	rplR	61.1952	62.337	0.138087
Glutamate 5-kinase	P0A7B5	trmD	50.973	52.1085	0.0073504
LexA repressor	P0A7C2	ugpB	54.5182	55.6452	0.0606337
Peptidyl-tRNA hydrolase	P0A7D1	ppiB	60.8551	61.9814	0.131591
Adenylosuccinate synthetase	P0A7D4	yceI	62.9051	64.0313	0.469558
Phosphoribosylaminoimidazole-succinocarboxamide synthase	P0A7D7	rlmE	47.8737	48.9904	0.0801134
Dihydroorotate dehydrogenase (quinone)	P0A7E1	bamC	65.0872	66.2027	0.0814396
CTP synthase	P0A7E5	alsB	57.4257	58.5274	0.0304883
Aspartate carbamoyltransferase regulatory chain	P0A7F3	yaaA	52.7526	53.8471	0.244761
S-adenosylmethionine:tRNA ribosyltransferase-isomerase	P0A7F9	ompR	54.8147	55.907	0.144577
Ribosome-binding factor A	P0A7G2	ydhZ	53.5871	54.6773	0.404791
Protein RecA	P0A7G6	tsaA	64.4579	65.5464	0.0989786
Peptide chain release factor 1	P0A7I0	rseB	52.0179	53.1037	0.0587888
Peptide chain release factor 3	P0A7I4	frlR	56.3902	57.4714	0.0278516
3,4-dihydroxy-2-butanone 4-phosphate synthase	P0A7J0	hrpA	52.5268	53.6019	0.712807
50S ribosomal protein L11	P0A7J7	leuA	55.4615	56.5195	0.0240904
50S ribosomal protein L19	P0A7K6	rplK	55.8453	56.9003	0.002866
50S ribosomal protein L1	P0A7L0	hslR	60.0933	61.1433	0.106945
50S ribosomal protein L20	P0A7L3	rpsH	56.0736	57.1157	0.028512
50S ribosomal protein L28	P0A7M2	holC	55.3099	56.3421	0.269865
50S ribosomal protein L9	P0A7R1	amiB	58.9616	59.9936	0.217202
30S ribosomal protein S10	P0A7R5	thrS	55.1	56.1284	0.0118544
30S ribosomal protein S11	P0A7R9	zapE	47.438	48.4581	0.059182
30S ribosomal protein S12	P0A7S3	moeA	54.5447	55.5573	0.000675565
30S ribosomal protein S13	P0A7S9	yafD	59.2851	60.2891	0.73481
30S ribosomal protein S16	P0A7T3	rplM	54.3446	55.3485	0.0282311
30S ribosomal protein S18	P0A7T7	yghJ	58.6386	59.6299	0.286083
30S ribosomal protein S2	P0A7V0	ompX	58.4783	59.4677	0.728699
30S ribosomal protein S3	P0A7V3	nadE	51.6224	52.6074	0.0150391
30S ribosomal protein S4	P0A7V8	yqgE	61.9009	62.8791	0.25486
30S ribosomal protein S5	P0A7W1	ulaR	62.1744	63.1457	0.361246
30S ribosomal protein S8	P0A7W7	rplE	53.6814	54.6506	0.490564
30S ribosomal protein S9	P0A7X3	yjjV	56.6364	57.6001	0.142574
Ribonuclease 3	P0A7Y0	yajO	50.3897	51.3454	0.173546
Ribonuclease HI	P0A7Y4	smpB	55.1052	56.0572	0.167001
Ribonuclease P protein component	P0A7Y8	folA	60.5977	61.5494	0.408868
Ribose-5-phosphate isomerase A	P0A7Z0	yfhH	55.8198	56.7702	0.236355
DNA-directed RNA polymerase subunit alpha	P0A7Z4	dgoR	52.2166	53.1557	0.0496545
L-seryl-tRNA(Sec) selenium transferase	P0A821	rplW	61.6763	62.6104	0.450978
Sugar fermentation stimulation protein A	P0A823	yqcA	62.5993	63.524	0.387455
Serine hydroxymethyltransferase	P0A825	gutQ	57.5585	58.4792	0.00651941
SsrA-binding protein	P0A832	curA	61.413	62.3157	0.0204292
Succinyl-CoA ligase [ADP-forming] subunit beta	P0A836	cmoB	52.6156	53.5178	0.0886325
5/3-nucleotidase SurE	P0A840	aspS	60.6942	61.5944	0.00877383
Queuine tRNA-ribosyltransferase	P0A847	mqo	54.258	55.1578	0.684544
Trigger factor	P0A850	ycjW	58.7987	59.693	0.365489
Tryptophanase	P0A853	purN	53.9919	54.8753	0.625891
Protein TolB	P0A855	glyA	65.141	66.0125	0.0633166
Triosephosphate isomerase	P0A858	azoR	56.7583	57.6273	0.102015
Thiol peroxidase	P0A862	pflB	56.0029	56.8579	0.234992
Transaldolase A	P0A867	corC	61.1157	61.9592	0.152267
Transaldolase B	P0A870	glpD	55.8309	56.6624	0.420987
tRNA (guanine-N(1)-)-methyltransferase	P0A873	livK	53.961	54.79	0.286287
Tryptophan synthase alpha chain	P0A877	yidE	64.5877	65.4157	0.468712
Thymidylate synthase	P0A884	metL	49.6231	50.4408	0.0259294
Ubiquinone/menaquinone biosynthesis C-methyltransferase UbiE	P0A887	pheS	54.3136	55.1259	0.328528
RNase adapter protein RapZ	P0A894	rplS	53.108	53.9173	0.0520595
Probable transcriptional regulatory protein YeeN	P0A8A2	yaiE	59.8514	60.659	0.166727
Phosphoenolpyruvate synthase regulatory protein	P0A8A4	rho	50.87	51.677	0.0326845
Ribosome maturation factor RimP	P0A8A8	seqA	61.88	62.6741	0.486422
O-acetyl-ADP-ribose deacetylase	P0A8D6	priC	57.4817	58.2724	0.276973
UPF0227 protein YcfP	P0A8E1	lpxB	50.1835	50.972	0.482929
UPF0234 protein YajQ	P0A8E7	nuoF	62.0439	62.8322	0.644595
Uracil phosphoribosyltransferase	P0A8F0	dnaN	49.7835	50.568	0.0419337
Uridine kinase	P0A8F4	pta	58.0848	58.8637	0.0523509
UvrABC system protein B	P0A8F8	rpsO	62.9093	63.6874	0.198869
Uronate isomerase	P0A8G3	ygfA	48.3562	49.1334	0.0844122
NAD(P)H dehydrogenase (quinone)	P0A8G6	ykgO	56.9771	57.7475	0.394558
UPF0246 protein YaaA	P0A8I3	ycaO	58.7381	59.492	0.128197
tRNA (guanine-N(7)-)-methyltransferase	P0A8I5	rpsC	47.0536	47.8031	0.224013
Ribosomal RNA large subunit methyltransferase H	P0A8I8	ybeZ	62.7554	63.5043	0.358642
ATP-dependent RNA helicase RhlB	P0A8J8	hldD	55.3272	56.076	0.10319
Serine--tRNA ligase	P0A8L1	kdsD	52.0765	52.825	0.00775352
Threonine--tRNA ligase	P0A8M3	surA	57.2352	57.9822	0.00891696
Macrodomain Ter protein	P0A8N0	ydgH	61.8688	62.6036	0.0822046
Lysine--tRNA ligase	P0A8N3	clpB	62.6088	63.3356	0.0656709
Lysine--tRNA ligase, heat inducible	P0A8N5	atpH	54.6449	55.3685	0.680841
Elongation factor P--(R)-beta-lysine ligase	P0A8N7	trpC	61.6799	62.4028	0.225693
Tyrosine recombinase XerD	P0A8P8	tyrA	57.0572	57.7741	0.308157
HTH-type transcriptional regulator HdfR	P0A8R9	folC	60.6212	61.3326	0.232634
HTH-type transcriptional regulator ArgP	P0A8S1	argS	53.7939	54.5034	0.00667465
NA	P0A8T1	yfcD	60.1605	60.8633	0.36255
DNA-directed RNA polymerase subunit beta	P0A8T7	lysS	52.22	52.9149	0.0596301
Protein Syd	P0A8U0	rsd	61.0126	61.689	0.486266
UPF0294 protein YafD	P0A8U2	yeeN	61.4953	62.1675	0.342224
DNA-directed RNA polymerase subunit beta	P0A8V2	ycbB	53.6162	54.286	0.399659
Transcriptional regulator SlyA	P0A8W2	mhpC	59.8933	60.556	0.544533
UPF0301 protein YqgE	P0A8W5	smtA	63.9156	64.5732	0.722685
Protein YceI	P0A8X2	yebE	55.5036	56.1593	0.690218
Alpha-D-glucose-1-phosphate phosphatase YihX	P0A8Y3	leuS	53.0873	53.7368	0.0179936
Sugar phosphatase YidA	P0A8Y5	ahpF	61.9214	62.5706	0.181409
Proofreading thioesterase EntH	P0A8Y8	purB	60.3047	60.9535	0.407775
Acyl-CoA thioester hydrolase YbgC	P0A8Z3	trpS	54.1068	54.7553	0.175511
Outer membrane lipoprotein Blc	P0A901	bolA	60.4095	61.0566	0.607379
Outer membrane protein assembly factor BamC	P0A903	hslO	63.8904	64.5337	0.361771
Outer membrane protein A	P0A910	aceA	54.5235	55.1482	0.385971
Outer membrane protein X	P0A917	ynjE	51.5606	52.1839	0.40104
Outer membrane protein assembly factor BamA	P0A940	yciK	57.5864	58.2079	0.04171
Ribosomal-protein-alanine acetyltransferase	P0A948	sad	49.1841	49.8014	0.197341
Spermidine N(1)-acetyltransferase	P0A951	rnhA	61.9275	62.528	0.0728487
3-oxoacyl-[acyl-carrier-protein] synthase 1	P0A953	tesA	61.1779	61.7743	0.0205087
Glutamate-pyruvate aminotransferase AlaA	P0A959	pabC	60.7905	61.3824	0.787318
L-asparaginase 1	P0A962	yiiQ	63.1532	63.7436	0.352766
DNA polymerase III subunit beta	P0A988	htpG	61.4445	62.0322	0.0901978
Fructose-1,6-bisphosphatase class 1	P0A993	kefG	57.9096	58.4965	0.490415
Cell division protein FtsZ	P0A9A6	rpsE	50.3558	50.9413	0.360106
Glyceraldehyde-3-phosphate dehydrogenase A	P0A9B2	bglA	55.3724	55.9507	0.320782
D-erythrose-4-phosphate dehydrogenase	P0A9B6	rfbB	51.5376	52.1065	0.474235
Fructose-1,6-bisphosphatase 1 class 2	P0A9C9	rpsL	51.1542	51.7209	0.615137
Transcriptional regulator MntR	P0A9F1	rpoN	57.1891	57.7459	0.646696
HTH-type transcriptional regulator CysB	P0A9F3	uvrA	66.0398	66.5924	0.281185
Glycine cleavage system transcriptional activator	P0A9F6	valS	57.0049	57.5525	0.0674838
Isocitrate lyase	P0A9G6	nrdA	54.0204	54.5559	0.106496
G/U mismatch-specific DNA glycosylase	P0A9H1	tdcE	55.2716	55.8033	0.505581
Cob(I)yrinic acid a,c-diamide adenosyltransferase	P0A9H5	coaE	55.1595	55.6906	0.490922
Glycine cleavage system transcriptional repressor	P0A9I3	panM	55.2834	55.8125	0.723651
Ribonuclease G	P0A9J0	rlmL	50.6597	51.1847	0.0975604
2-dehydropantoate 2-reductase	P0A9J4	zapA	56.3794	56.9019	0.733861
Ribokinase	P0A9J6	tyrR	47.8048	48.3222	0.539544
P-protein;Chorismate mutase;Prephenate dehydratase	P0A9J8	tauA	58.2097	58.7265	0.499676
PhoH-like protein	P0A9K3	xthA	53.0297	53.5425	0.335808
Phosphate-specific transport system accessory protein PhoU	P0A9K7	yceH	55.5891	56.1009	0.158502
FKBP-type 22 kDa peptidyl-prolyl cis-trans isomerase	P0A9L3	yjbQ	65.5567	66.0672	0.70664
Peptidyl-prolyl cis-trans isomerase C	P0A9L5	rcsF	55.6432	56.1528	0.927414
Hypoxanthine phosphoribosyltransferase	P0A9M2	glnH	65.6771	66.1849	0.519857
Xanthine phosphoribosyltransferase	P0A9M5	infB	57.6607	58.1649	0.262541
Phosphate acetyltransferase	P0A9M8	sucD	57.7116	58.2152	0.245522
Pyruvate formate-lyase 1-activating enzyme	P0A9N4	glpR	59.8582	60.3577	0.285433
Acetyl-coenzyme A carboxylase carboxyl transferase subunit beta	P0A9Q5	pepN	47.7775	48.2682	0.0530754
Aldehyde-alcohol dehydrogenase;Alcohol dehydrogenase;Acetaldehyde dehydrogenase [acetylating];Pyruvate-formate-lyase deactivase	P0A9Q7	crp	58.7039	59.1926	0.0565929
Galactitol-1-phosphate 5-dehydrogenase	P0A9S3	rsmJ	57.6275	58.1146	0.243689
D-3-phosphoglycerate dehydrogenase	P0A9T0	nfi	61.9181	62.4011	0.558633
Protein tas	P0A9T4	engB	64.3372	64.8123	0.507825
Uncharacterized ABC transporter ATP-binding protein YbbA	P0A9T8	sbcB	50.8855	51.3577	0.444319
Uncharacterized ABC transporter ATP-binding protein YbiT	P0A9U3	grpE	59.7695	60.2246	0.324592
Lipopolysaccharide export system ATP-binding protein LptB	P0A9V1	trpA	60.9781	61.4284	0.300793
HTH-type transcriptional regulator UlaR	P0A9W0	rpsD	46.5139	46.9601	0.157278
Energy-dependent translational throttle protein EttA	P0A9W3	comR	62.0351	62.4767	0.671143
Protein YrdA	P0A9W9	rclA	64.5123	64.9506	0.812171
Zinc import ATP-binding protein ZnuC	P0A9X1	aroA	62.9035	63.3409	0.488886
Rod shape-determining protein MreB	P0A9X4	yehT	61.6314	62.0685	0.801771
50S ribosomal protein L13	P0AA10	potA	52.51	52.9449	0.912107
Transcriptional regulatory protein OmpR	P0AA16	rplQ	53.5357	53.9646	0.455945
Ribosomal small subunit pseudouridine synthase A	P0AA43	yhjJ	57.2535	57.6732	0.240869
UTP--glucose-1-phosphate uridylyltransferase	P0AAB6	ybiT	46.3329	46.7391	0.35352
Universal stress protein E	P0AAC0	mngR	52.9974	53.4017	0.624158
Arginine transport ATP-binding protein ArtP	P0AAF6	accB	60.9489	61.3456	0.0919996
Dipeptide transport ATP-binding protein DppD	P0AAG0	acpS	55.9094	56.2986	0.896549
Phosphate import ATP-binding protein PstB	P0AAH0	tdk	65.2197	65.6071	0.635585
Malonyl CoA-acyl carrier protein transacylase	P0AAI9	dadA	50.1084	50.4873	0.292198
Uncharacterized protein YbaA	P0AAQ6	gyrA	60.1498	60.5143	0.355341
Cys-tRNA(Pro)/Cys-tRNA(Cys) deacylase YbaK	P0AAR3	rne	54.8931	55.2561	0.848666
Uncharacterized protein YbdF	P0AAT2	mtlD	62.5731	62.9324	0.249098
Ribosomal silencing factor RsfS	P0AAT6	yciT	56.3427	56.6995	0.299197
Uncharacterized protein YbgJ	P0AAV4	yahK	60.4437	60.7869	0.371938
Probable L,D-transpeptidase YbiS	P0AAX8	nadC	58.9454	59.2871	0.25269
Replication-associated recombination protein A	P0AAZ4	yhaJ	53.0703	53.4103	0.370493
Sulfurtransferase TusE	P0AB18	murI	65.2138	65.5522	0.763116
Penicillin-binding protein activator LpoB	P0AB38	mutS	54.4019	54.7379	0.947502
Protein YcgL	P0AB43	ptsN	65.0875	65.4188	0.789635
Fructose-bisphosphate aldolase class 2	P0AB71	ybiS	52.3517	52.6819	0.630865
2-amino-3-ketobutyrate coenzyme A ligase	P0AB77	rluF	60.804	61.134	0.659191
Endonuclease III	P0AB83	ssb	58.5844	58.9127	0.387954
Adenylosuccinate lyase	P0AB89	rlmM	51.0494	51.3767	0.16865
Phospho-2-dehydro-3-deoxyheptonate aldolase, Phe-sensitive	P0AB91	glrR	52.6644	52.987	0.358308
ATP synthase subunit delta	P0ABA4	alaS	55.719	56.0254	0.0645987
ATP synthase gamma chain	P0ABA6	uspG	62.3108	62.6158	0.659564
ATP synthase subunit alpha	P0ABB0	pbpG	57.5104	57.8105	0.382496
ATP synthase subunit beta	P0ABB4	ydjA	65.1259	65.4246	0.90522
Bacterioferritin	P0ABD3	eco	64.515	64.8094	0.2535
Acetyl-coenzyme A carboxylase carboxyl transferase subunit alpha	P0ABD5	nusA	60.0546	60.3475	0.633422
Biotin carboxyl carrier protein of acetyl-CoA carboxylase	P0ABD8	katG	49.4208	49.7135	0.608481
Protein BolA	P0ABE2	hpt	58.2414	58.5324	0.368547
Poly(A) polymerase I	P0ABF1	uxaA	54.827	55.1158	0.626687
Cell division protein FtsA	P0ABH0	lysU	50.9447	51.2312	0.43101
ATP-dependent Clp protease ATP-binding subunit ClpA	P0ABH9	glnD	55.2242	55.4997	0.391494
Cytochrome bo(3) ubiquinol oxidase subunit 2	P0ABJ1	manX	54.2941	54.5689	0.523562
Coenzyme A biosynthesis bifunctional protein CoaBC;Phosphopantothenoylcysteine decarboxylase;Phosphopantothenate--cysteine ligase	P0ABQ0	glpE	60.5017	60.7654	0.771032
2-hydroxy-3-oxopropionate reductase	P0ABQ2	aceB	56.6169	56.8793	0.892171
Dihydrofolate reductase	P0ABQ4	kdgR	56.8859	57.1434	0.37886
1,4-dihydroxy-2-naphthoyl-CoA synthase	P0ABU0	tusE	65.1376	65.3942	0.718386
Ribosome-binding ATPase YchF	P0ABU2	nagC	61.7624	62.0161	0.521805
Chaperone SurA	P0ABZ6	yjhP	52.7529	52.9973	0.774068
Dihydropteroate synthase	P0AC13	rob	54.8736	55.117	0.170195
5-formyltetrahydrofolate cyclo-ligase	P0AC28	prmB	62.6259	62.868	0.5609
NA	P0AC33	uspE	63.231	63.4713	0.417875
Aspartate ammonia-lyase	P0AC38	yhaK	61.3081	61.5437	0.950046
Succinate dehydrogenase flavoprotein subunit	P0AC41	yejK	54.2859	54.5172	0.292741
Glucose-6-phosphate 1-dehydrogenase;Extracellular death factor	P0AC53	yciZ	60.4202	60.6509	0.961511
Glutaredoxin-2	P0AC59	tilS	51.8465	52.063	0.211478
Lactoylglutathione lyase	P0AC81	topA	56.8167	57.0327	0.0310011
Hydroxyacylglutathione hydrolase	P0AC84	ygdH	61.7003	61.9125	0.684695
Glycogen phosphorylase	P0AC86	hldE	64.5609	64.7667	0.892081
Stringent starvation protein A	P0ACA3	tyrS	62.1144	62.32	0.460546
Replicative DNA helicase	P0ACB0	pepP	51.2719	51.4758	0.642603
Protoporphyrinogen IX dehydrogenase [menaquinone]	P0ACB4	glk	52.0141	52.213	0.836348
Protein HemY	P0ACB7	fabG	56.8371	57.0287	0.780344
Bifunctional protein GlmU;UDP-N-acetylglucosamine pyrophosphorylase;Glucosamine-1-phosphate N-acetyltransferase	P0ACC7	yicC	57.0982	57.2837	0.580484
HIT-like protein HinT	P0ACE7	yfiH	64.7928	64.9694	0.871036
Heat shock protein 15	P0ACG8	rhlB	62.2769	62.4485	0.669557
Right origin-binding protein	P0ACI0	yfiF	60.7698	60.9388	0.10718
Leucine-responsive regulatory protein	P0ACJ0	ybeM	64.9208	65.0894	0.909155
cAMP-activated global transcriptional regulator CRP	P0ACJ8	pepD	57.376	57.541	0.586431
Putative aga operon transcriptional repressor	P0ACK2	kdpE	56.2145	56.373	0.956882
Deoxyribose operon repressor	P0ACK5	ygiF	52.5297	52.6796	0.457329
Glycerol-3-phosphate regulon repressor	P0ACL0	map	52.5098	52.6522	0.892797
Pyruvate dehydrogenase complex repressor	P0ACL9	bisC	58.4435	58.5831	0.930096
Uncharacterized HTH-type transcriptional regulator YegW	P0ACM5	pheT	52.17	52.309	0.735948
HTH-type transcriptional repressor AllR	P0ACN4	dapE	58.1607	58.2962	0.749963
HTH-type transcriptional repressor CytR	P0ACN7	rfaF	52.5261	52.6542	0.873792
Catabolite repressor/activator	P0ACP1	hemD	57.8664	57.9935	0.951177
HTH-type transcriptional regulator GntR	P0ACP5	ribD	62.4839	62.5969	0.575352
HTH-type transcriptional repressor PurR	P0ACP7	ptrA	54.0484	54.1592	0.530168
Hydrogen peroxide-inducible genes activator	P0ACQ4	treR	54.9144	55.0211	0.943288
Uncharacterized HTH-type transcriptional regulator YfeR	P0ACR7	rsmD	58.5203	58.6108	0.929576
Transcriptional repressor MprA	P0ACR9	galU	62.8339	62.9196	0.873337
HTH-type transcriptional regulator AcrR	P0ACS9	solA	63.5138	63.5919	0.727915
HTH-type transcriptional repressor FabR	P0ACU5	nlpD	57.3416	57.4109	0.944891
Uncharacterized protein YdhZ	P0ACX5	hisS	56.7632	56.8311	0.819474
Putative NAD(P)H nitroreductase YdjA	P0ACY1	oxyR	56.1558	56.2193	0.791024
Uncharacterized protein YecJ	P0AD10	murD	59.2101	59.2715	0.896014
Protein YeeZ	P0AD12	gsiA	54.5357	54.5884	0.986038
Octaprenyl-diphosphate synthase	P0AD57	hscA	52.3221	52.3747	0.860189
Peptidoglycan synthase FtsI	P0AD68	ghrA	54.5952	54.6402	0.928508
Leu/Ile/Val-binding protein	P0AD96	purR	61.9799	62.0158	0.957186
Acyl-CoA thioesterase I	P0ADA1	pepT	51.2431	51.2768	0.899048
Murein hydrolase activator NlpD	P0ADA3	trmB	58.9947	59.0258	0.959433
Uncharacterized lipoprotein YajG	P0ADA5	murF	57.3277	57.3341	0.994657
LPS-assembly lipoprotein LptE	P0ADC1	priA	55.3014	55.3073	0.998566
tRNA-modifying protein YgfZ	P0ADE8	narL	64.9542	64.9552	0.999253
Phosphogluconate dehydratase	P0ADF6	cysS	60.4227	60.4136	0.969551
Enterobactin synthase component B;Isochorismatase;Aryl carrier protein	P0ADI4	gabD	64.3069	64.2937	0.994735
Isochorismatase family protein YecD	P0ADI7	rplV	58.322	58.3029	0.972815
Uncharacterized protein YiaF	P0ADK0	ddlA	54.7693	54.7483	0.931701
Flavin mononucleotide phosphatase YigB	P0ADP0	mdoD	57.8718	57.8448	0.921604
Uncharacterized protein YiiD	P0ADQ2	manA	57.8221	57.7932	0.946496
Ribosomal RNA large subunit methyltransferase M	P0ADR6	proX	56.3629	56.3294	0.978407
LOG family protein YgdH	P0ADR8	pldB	48.7106	48.66	0.960261
Cell division protein ZapA	P0ADS2	mak	66.1017	66.04	0.895787
Probable quinol monooxygenase YgiN	P0ADU2	guaA	63.0792	63.017	0.930187
Uncharacterized protein YhbW	P0ADV5	glnS	52.8571	52.7934	0.679099
Lipopolysaccharide export system protein LptC	P0ADV9	dsbG	63.4186	63.3522	0.908266
Inner membrane protein YhcB	P0ADW3	slt	54.1197	54.0529	0.786992
Ribosomal RNA small subunit methyltransferase D	P0ADX9	aroH	50.732	50.6542	0.833449
Peptidyl-prolyl cis-trans isomerase D	P0ADY1	ydfG	57.1049	57.0216	0.849151
50S ribosomal protein L14	P0ADY3	rpsR	51.2473	51.1587	0.904357
50S ribosomal protein L16	P0ADY7	rsuA	60.7265	60.6379	0.688816
50S ribosomal protein L23	P0ADZ0	yiaJ	51.7481	51.6565	0.775436
30S ribosomal protein S15	P0ADZ4	garK	63.3306	63.2178	0.900654
tRNA (cytidine/uridine-2-O-)-methyltransferase TrmJ	P0AE01	trkA	56.3658	56.245	0.896476
NA	P0AE06	panE	60.6541	60.53	0.948056
Alkyl hydroperoxide reductase subunit C	P0AE08	mscL	51.6307	51.5009	0.972363
Methionine aminopeptidase	P0AE18	speC	66.0769	65.9445	0.804021
Transcriptional regulatory protein YpdB	P0AE39	lrhA	64.9706	64.8354	0.855608
UPF0053 inner membrane protein YtfL	P0AE45	murA	57.3153	57.1764	0.706098
mRNA interferase MazF	P0AE70	ycbL	63.8143	63.6726	0.918229
Magnesium and cobalt efflux protein CorC	P0AE78	nei	59.8609	59.7188	0.687089
D-alanyl-D-alanine carboxypeptidase DacA	P0AEB2	hda	48.0171	47.8735	0.866197
Succinyl-diaminopimelate desuccinylase	P0AED7	uvrB	50.3646	50.2141	0.687762
Protein DcrB	P0AEE1	ispA	55.1023	54.9429	0.692437
Phosphatase NudJ	P0AEI6	lhr	55.3447	55.1846	0.973046
Isochorismate synthase EntC	P0AEJ2	mnmA	64.7615	64.6011	0.848164
3-oxoacyl-[acyl-carrier-protein] reductase FabG	P0AEK2	ytfQ	63.3517	63.1892	0.932819
Enoyl-[acyl-carrier-protein] reductase [NADH] FabI	P0AEK4	murB	58.0093	57.8467	0.494805
Ferrienterobactin-binding periplasmic protein	P0AEL6	ppiA	60.767	60.5959	0.694185
NAD(P)H-flavin reductase	P0AEN1	ybdF	58.2267	58.0468	0.611856
UTP--glucose-1-phosphate uridylyltransferase	P0AEP3	usg	59.5176	59.3371	0.769181
Glutamine-binding periplasmic protein	P0AEQ3	uxuB	59.1407	58.9551	0.839902
Bifunctional glutathionylspermidine synthetase/amidase;Glutathionylspermidine amidase;Glutathionylspermidine synthetase	P0AES0	prfA	60.6302	60.4376	0.571585
DNA gyrase subunit A	P0AES4	xylA	62.6203	62.4261	0.73117
DNA gyrase subunit B	P0AES6	rluB	57.5488	57.3537	0.802853
Histidine-binding periplasmic protein	P0AEU0	dppD	56.7865	56.5913	0.829133
Hydrogenase 3 maturation protease	P0AEV9	phoB	60.7534	60.5563	0.557592
Inosine-guanosine kinase	P0AEW6	argT	60.7873	60.5899	0.538117
1-phosphofructokinase	P0AEW9	ansA	58.449	58.2496	0.602532
Probable phosphoribulokinase	P0AEX5	arnT	53.7461	53.5444	0.953987
Maltose-binding periplasmic protein	P0AEX9	yfaY	61.3215	61.1175	0.412796
Nucleoside triphosphate pyrophosphohydrolase	P0AEY3	wecC	58.8492	58.6381	0.485209
5,10-methylenetetrahydrofolate reductase	P0AEZ1	pgi	59.9252	59.7114	0.434687
Septum site-determining protein MinD	P0AEZ3	ileS	60.6007	60.3819	0.547256
Protein mrp	P0AF08	lysA	62.8712	62.6508	0.448875
5-methylthioadenosine/S-adenosylhomocysteine nucleosidase	P0AF12	fabA	66.403	66.1796	0.693357
N-acetylglucosamine-6-phosphate deacetylase	P0AF18	ydeN	54.4768	54.246	0.597544
N-acetylglucosamine repressor	P0AF20	ycjY	59.346	59.1152	0.80752
Nitrate/nitrite response regulator protein NarL	P0AF28	entF	51.0801	50.8395	0.384209
UPF0047 protein YjbQ	P0AF48	pyrF	66.4329	66.1922	0.665779
tRNA threonylcarbamoyladenosine biosynthesis protein TsaE	P0AF67	nuoG	60.9383	60.6921	0.0019729
Toxin-antitoxin biofilm protein TabA	P0AF96	fabB	50.1107	49.8552	0.029539
Transcription termination/antitermination protein NusA	P0AFF6	dacA	51.3704	51.1137	0.920224
Transcription termination/antitermination protein NusG	P0AFG0	tsaC	59.2207	58.963	0.665091
2-oxoglutarate dehydrogenase E1 component	P0AFG3	nadR	47.5905	47.3244	0.420879
Dihydrolipoyllysine-residue succinyltransferase component of 2-oxoglutarate dehydrogenase complex	P0AFG6	baeR	64.7132	64.4454	0.613279
Pyruvate dehydrogenase E1 component	P0AFG8	wecD	60.2324	59.9607	0.869033
DNA topoisomerase 4 subunit A	P0AFI2	rdgB	62.0611	61.7867	0.456204
D-alanyl-D-alanine endopeptidase	P0AFI5	ilvH	54.4712	54.1879	0.596193
Phosphate regulon transcriptional regulatory protein PhoB	P0AFJ5	yiiM	65.2366	64.9451	0.866598
Metalloprotease PmbA	P0AFK0	mrcB	61.0788	60.7824	0.267899
Peptidyl-prolyl cis-trans isomerase A	P0AFL3	ldcC	62.7789	62.4783	0.842213
Exopolyphosphatase	P0AFL6	ilvC	49.6924	49.3917	0.0568479
Glycine betaine-binding periplasmic protein	P0AFM2	matP	57.5564	57.2484	0.892065
Putative GTP cyclohydrolase 1 type 2	P0AFP6	tusC	66.4489	66.1368	0.628708
Uncharacterized deoxyribonuclease YcfH	P0AFQ7	pckA	57.1344	56.8186	0.279336
Uncharacterized protein YciO	P0AFR4	pka	54.3616	54.0419	0.91214
Transcriptional regulatory protein YehT	P0AFT5	fruB	56.4948	56.1717	0.663017
Transcriptional regulatory protein GlrR	P0AFU4	purC	56.6328	56.3085	0.0817363
Riboflavin synthase	P0AFU8	rplT	47.2017	46.864	0.824983
Regulator of sigma D	P0AFX4	proB	52.5292	52.1822	0.239954
Sigma-E factor regulatory protein RseB	P0AFX9	menF	62.5514	62.2042	0.719654
Negative modulator of initiation of replication	P0AFY8	rimP	65.9304	65.5817	0.728583
Stringent starvation protein B	P0AFZ3	ybiB	58.1915	57.8357	0.121942
GTP pyrophosphokinase	P0AG20	nusG	58.8098	58.4446	0.810007
Transcription termination factor Rho	P0AG30	slmA	65.2201	64.8536	0.714719
Riboflavin biosynthesis protein RibF;Riboflavin kinase;FMN adenylyltransferase	P0AG40	acnA	55.5765	55.1997	0.497872
50S ribosomal protein L17	P0AG44	tabA	60.2257	59.847	0.571466
50S ribosomal protein L21	P0AG48	narP	66.1509	65.7654	0.696551
50S ribosomal protein L30	P0AG51	erfK	56.0416	55.6552	0.396858
50S ribosomal protein L6	P0AG55	ppiD	57.3037	56.9157	0.744542
30S ribosomal protein S14	P0AG59	pncB	57.9631	57.5724	0.554062
30S ribosomal protein S17	P0AG63	mnmG	58.2386	57.8475	0.166008
30S ribosomal protein S1	P0AG67	pgk	66.5611	66.1639	0.620105
sn-glycerol-3-phosphate-binding periplasmic protein UgpB	P0AG80	puuC	61.2512	60.849	0.355396
Uncharacterized oxidoreductase YghA	P0AG84	yihX	57.7739	57.3577	0.695936
Protein-export protein SecB	P0AG86	glmS	58.2244	57.8024	0.0118706
Protein translocase subunit SecD	P0AG90	citF	62.3084	61.8852	0.639111
Phosphoserine phosphatase	P0AGB0	rsmF	58.3176	57.8879	0.660876
ECF RNA polymerase sigma-E factor	P0AGB6	dsdA	62.0354	61.6057	0.0152615
Soluble lytic murein transglycosylase	P0AGC3	bcsC	57.3345	56.8959	0.853086
Signal recognition particle protein	P0AGD7	sufC	58.4521	58.0092	0.659215
Single-stranded DNA-binding protein	P0AGE0	hemF	61.912	61.4685	0.104044
Succinyl-CoA ligase [ADP-forming] subunit alpha	P0AGE9	ynfL	63.8614	63.4144	0.00915706
Sulfur acceptor protein CsdE	P0AGF2	ydhF	64.7604	64.3132	0.528244
Thiamine-monophosphate kinase	P0AGG0	gcvA	54.533	54.0852	0.37061
Metalloprotease TldD	P0AGG8	lexA	65.2702	64.8207	0.506815
Trk system potassium uptake protein TrkA	P0AGI8	nnr	57.3385	56.8877	0.224845
tRNA (guanosine(18)-2-O)-methyltransferase	P0AGJ2	sdhB	55.2349	54.7821	0.620119
Uncharacterized tRNA/rRNA methyltransferase YfiF	P0AGJ5	fumC	58.5896	58.1328	0.137148
tRNA (cytidine(34)-2-O)-methyltransferase	P0AGJ7	ybhB	55.4677	55.01	0.149854
Tyrosine--tRNA ligase	P0AGJ9	hisA	59.9975	59.5367	0.322865
Ribosomal RNA small subunit methyltransferase E	P0AGL7	dppF	59.6769	59.2064	0.731813
50S ribosomal protein L18	P0C018	yeaD	60.2671	59.7954	0.429678
UPF0345 protein YaiE	P0C037	nth	59.0272	58.5378	0.731455
Small heat shock protein IbpA	P0C054	proS	63.8623	63.3653	0.440698
Small heat shock protein IbpB	P0C058	nfsA	66.5136	66.0137	0.387576
Nucleoid occlusion factor SlmA	P0C093	ibpA	60.7128	60.2097	0.732918
Protein RdoA	P0C0K3	sthA	61.3457	60.8246	0.0377935
Ribosomal RNA large subunit methyltransferase E	P0C0R7	ymdB	61.7996	61.2768	0.592365
Phosphoethanolamine transferase EptC	P0CB39	secB	65.162	64.6338	0.788347
Elongation factor Tu 2;Elongation factor Tu 1	P0CE48;P0CE47	thiI	58.4347	57.9063	0.177444
Inactive ribonuclease PH	P0CG19	mlaF	55.6284	55.0991	0.775265
Putative lipoprotein AcfD homolog	P0CK95	plsB	55.6849	55.1487	0.889549
Rare lipoprotein A	P10100	argP	49.194	48.6568	0.206089
Glutamine transport ATP-binding protein GlnQ	P10346	truB	60.2406	59.6939	0.473781
1-(5-phosphoribosyl)-5-[(5-phosphoribosylamino)methylideneamino] imidazole-4-carboxamide isomerase	P10371	sucA	48.2126	47.6633	0.0888827
Enterobactin synthase component E	P10378	yfhM	56.9736	56.4222	0.677897
Protein translocase subunit SecA	P10408	argB	66.2469	65.6902	0.515827
Alkaline phosphatase isozyme conversion protein	P10423	galF	56.8629	56.3061	0.261161
Lipid-A-disaccharide synthase	P10441	osmF	60.8103	60.2463	0.357134
L-aspartate oxidase	P10902	cra	54.7601	54.1955	0.783177
Glycerophosphoryl diester phosphodiesterase	P10908	ahpC	61.3909	60.8255	0.302421
Argininosuccinate lyase	P11447	yadG	58.2283	57.6627	0.811258
Enterobactin synthase component F	P11454	tusB	65.6582	65.0914	0.629513
Quinolinate synthase A	P11458	yfcH	52.844	52.2754	0.080621
Arginine--tRNA ligase	P11875	agaR	62.834	62.2591	0.0671371
UDP-N-acetylmuramoyl-tripeptide--D-alanyl-D-alanine ligase	P11880	rlmB	63.1661	62.5817	0.0928832
Chorismate synthase	P12008	argE	59.5477	58.9603	0.0088832
Molybdopterin molybdenumtransferase	P12281	lipB	54.5713	53.9824	0.666398
Uracil-DNA glycosylase	P12295	gpmA	62.1444	61.5534	0.122165
UPF0098 protein YbhB	P12994	purL	48.0537	47.445	0.0165341
8-amino-7-oxononanoate synthase	P12998	rsmA	59.9181	59.3038	0.236764
ATP-dependent dethiobiotin synthetase BioD 1	P13000	pth	60.5842	59.9691	0.362753
Pimeloyl-[acyl-carrier protein] methyl ester esterase	P13001	nanE	58.3188	57.6981	0.53259
Methionine synthase	P13009	rlpA	58.5193	57.8966	0.925703
Protein FdhE	P13024	trmH	55.6657	55.0423	0.288766
Catalase-peroxidase	P13029	yahJ	56.4863	55.8565	0.131726
Aerobic glycerol-3-phosphate dehydrogenase	P13035	ptsP	62.1278	61.4954	0.470198
Enterochelin esterase	P13039	garR	63.9947	63.3597	0.450096
RNA polymerase sigma factor RpoS	P13445	hemH	49.5317	48.8847	0.360997
Mannosyl-D-glycerate transport/metabolism system repressor MngR	P13669	qorA	61.4714	60.8236	0.109437
Ribosomal-protein-serine acetyltransferase	P13857	glpQ	65.2759	64.6264	0.436432
Selenocysteine-specific elongation factor	P14081	rpiA	59.4407	58.791	0.454887
UDP-N-acetylmuramoylalanine--D-glutamate ligase	P14900	rpsM	59.9739	59.3241	0.471574
Xaa-Pro aminopeptidase	P15034	selA	58.9943	58.3387	0.694879
DNA ligase	P15042	araA	62.3489	61.6894	0.218775
2,3-dihydro-2,3-dihydroxybenzoate dehydrogenase	P15047	yhdW	60.8818	60.2163	0.13094
Glycogen debranching enzyme	P15067	prfC	49.5769	48.902	0.191788
Glucitol operon repressor	P15082	argG	56.3227	55.6432	0.169653
Phosphoribosylformylglycinamidine synthase	P15254	manB	53.5965	52.9102	0.183444
Cytosol non-specific dipeptidase	P15288	rlmI	64.1798	63.4906	0.126798
Bifunctional purine biosynthesis protein PurH;Phosphoribosylaminoimidazolecarboxamide formyltransferase;IMP cyclohydrolase	P15639	pdxJ	54.3651	53.6745	0.181088
Phosphoribosylamine--glycine ligase	P15640	pfkA	60.3974	59.7048	0.0118867
Shikimate dehydrogenase (NADP(+))	P15770	rbsK	64.36	63.6583	0.4587
Quinoprotein glucose dehydrogenase	P15877	aroE	65.0204	64.3166	0.315203
NA	P16095	mnmC	59.0305	58.325	0.0265994
tRNA dimethylallyltransferase	P16384	yncE	60.7777	60.0687	0.182819
Selenide, water dikinase	P16456	yidA	51.5116	50.7987	0.288665
DNA replication terminus site-binding protein	P16525	ybjD	57.7479	57.034	0.220701
Acetate operon repressor	P16528	mppA	54.1908	53.4718	0.102412
Proline--tRNA ligase	P16659	rsmC	60.7557	60.0357	0.359195
Thiosulfate-binding protein	P16700	yihW	62.4646	61.742	0.209088
2-succinyl-5-enolpyruvyl-6-hydroxy-3-cyclohexene-1-carboxylate synthase	P17109	ompA	57.7783	57.0525	0.67096
Arabinose 5-phosphate isomerase GutQ	P17115	recB	49.501	48.7681	0.542866
Oxygen-insensitive NADPH nitroreductase	P17117	lysR	58.5627	57.8297	0.210227
Glutamine--fructose-6-phosphate aminotransferase [isomerizing]	P17169	yhiN	58.4788	57.7434	0.031261
UDP-N-acetylglucosamine--N-acetylmuramyl-(pentapeptide) pyrophosphoryl-undecaprenol N-acetylglucosamine transferase	P17443	ddlB	63.1667	62.4285	0.00761556
NAD/NADP-dependent betaine aldehyde dehydrogenase	P17445	dusA	58.9471	58.2017	0.0805854
Sulfite reductase [NADPH] hemoprotein beta-component	P17846	bamA	58.6548	57.9044	0.343302
Phosphoadenosine phosphosulfate reductase	P17854	yjgR	58.466	57.7038	0.132191
Primosomal protein N	P17888	lepA	60.5312	59.7679	0.109591
UDP-N-acetylmuramate--L-alanine ligase	P17952	fabD	66.9374	66.1658	0.241385
Nicotinate phosphoribosyltransferase	P18133	gdhA	66.0837	65.3002	0.363344
Septum site-determining protein MinC	P18196	dapF	60.4202	59.6351	0.26794
Acetylornithine/succinyldiaminopimelate aminotransferase	P18335	minC	63.436	62.6446	0.187277
NH(3)-dependent NAD(+) synthetase	P18843	glnQ	54.154	53.355	0.814058
Gamma-glutamyltranspeptidase;Gamma-glutamyltranspeptidase large chain;Gamma-glutamyltranspeptidase small chain	P18956	rpsP	64.1867	63.3795	0.479473
Glucose-1-phosphatase	P19926	rapZ	51.0148	50.2066	0.573992
DNA topoisomerase 4 subunit B	P20083	yegU	60.557	59.7454	0.122726
Biotin sulfoxide reductase	P20099	menB	61.2822	60.4562	0.100615
Probable adenosine monophosphate-protein transferase fic	P20605	btuR	53.5583	52.7318	0.376629
PTS system fructose-specific EIIBC component;Fructose-specific phosphotransferase enzyme IIB component;Fructose permease IIC component	P20966	srmB	60.7152	59.8878	0.354463
3-ketoacyl-CoA thiolase	P21151	fadA	63.5276	62.6926	0.35897
Xaa-Pro dipeptidase	P21165	sfsA	55.0318	54.1957	0.571325
Ornithine decarboxylase, constitutive	P21169	malP	59.9011	59.064	0.0877707
Fatty acid oxidation complex subunit alpha;Enoyl-CoA hydratase/Delta(3)-cis-Delta(2)-trans-enoyl-CoA isomerase/3-hydroxybutyryl-CoA epimerase;3-hydroxyacyl-CoA dehydrogenase	P21177	pabB	57.2183	56.3773	0.577755
Ribonuclease R	P21499	hisH	59.3817	58.5374	0.238741
ATP-dependent RNA helicase SrmB	P21507	livJ	62.449	61.6027	0.111884
Ribonuclease E	P21513	fusA	64.4997	63.6517	0.0787131
Pyruvate kinase II	P21599	icd	61.2921	60.4425	0.00928735
UDP-3-O-(3-hydroxymyristoyl)glucosamine N-acyltransferase	P21645	rimL	62.3433	61.493	0.239494
KDP operon transcriptional regulatory protein KdpE	P21866	yfcF	52.2327	51.3818	0.0547324
Cysteine--tRNA ligase	P21888	gph	63.5394	62.6821	0.225666
Aspartate--tRNA ligase	P21889	pnp	66.3592	65.4915	0.207363
Asparagine synthetase B [glutamine-hydrolyzing]	P22106	yqfB	56.1134	55.2425	0.737273
UDP-N-acetylmuramoyl-L-alanyl-D-glutamate--2,6-diaminopimelate ligase	P22188	tgt	66.2689	65.3917	0.225189
3(2),5-bisphosphate nucleotidase CysQ	P22255	lasT	58.7436	57.8638	0.366188
Phosphoenolpyruvate carboxykinase [ATP]	P22259	glmU	66.8199	65.9378	0.155169
Adenosine deaminase	P22333	thiC	60.0849	59.1976	0.100404
Probable L,D-transpeptidase YcbB	P22525	ycfH	54.5821	53.6837	0.37178
Glutamate racemase	P22634	yjiA	55.211	54.2993	0.340401
High-affinity branched-chain amino acid transport ATP-binding protein LivF	P22731	rnb	49.288	48.3757	0.34899
Farnesyl diphosphate synthase	P22939	yghA	65.7416	64.8259	0.216661
tRNA/tmRNA (uracil-C(5))-methyltransferase	P23003	lsrB	59.585	58.658	0.155422
Protein MalY;Cystathionine beta-lyase MalY;Maltose regulon modulator	P23256	yqcC	63.0313	62.1028	0.765435
Thymidine kinase	P23331	dhaL	49.7418	48.8091	0.0172122
Glycerate 2-kinase	P23524	lptB	50.4521	49.5186	0.193668
Phosphoenolpyruvate synthase	P23538	ydgD	65.602	64.6618	0.246749
Ecotin	P23827	yeeZ	57.7821	56.823	0.0286032
CDP-diacylglycerol--serine O-phosphatidyltransferase	P23830	lpoA	55.6844	54.7236	0.661852
Transcriptional regulatory protein PhoP	P23836	rsmB	57.9146	56.9509	0.294272
UPF0701 protein YicC	P23839	ycjX	58.8177	57.8537	0.269351
Periplasmic oligopeptide-binding protein	P23843	rimJ	59.982	59.0137	0.115031
Primosomal replication protein N	P23862	rpoB	57.3989	56.4259	0.21639
Peptidyl-prolyl cis-trans isomerase B	P23869	rpoE	62.7993	61.8169	0.370877
Ferrochelatase	P23871	nagB	61.4657	60.4789	0.125654
Ferric enterobactin transport ATP-binding protein FepC	P23878	trmL	62.9121	61.9238	0.128577
Methionyl-tRNA formyltransferase	P23882	polA	56.8847	55.8963	0.00503695
Aldehyde dehydrogenase PuuC	P23883	gltX	66.9151	65.9213	0.250523
Acetylornithine deacetylase	P23908	trmJ	59.2534	58.2552	0.304836
DNA mismatch repair protein MutS	P23909	fhuC	57.2837	56.2793	0.854083
Fructokinase	P23917	truD	55.7723	54.7632	0.010333
Ornithine decarboxylase, inducible	P24169	kdsA	60.759	59.7485	0.00313354
Peptidyl-dipeptidase dcp	P24171	purA	65.5219	64.5093	0.0111091
Phosphomannomutase	P24175	dmlA	58.6454	57.6312	0.733929
Biotin carboxylase	P24182	talA	60.8437	59.8273	0.00294628
Mrr restriction system protein	P24202	tpx	60.3087	59.2897	0.294066
Uncharacterized GTP-binding protein YjiA	P24203	yhhX	60.7638	59.7409	0.129699
Mannonate dehydratase	P24215	yecD	62.9717	61.9477	0.0988137
Holo-[acyl-carrier-protein] synthase	P24224	ppiC	61.9248	60.892	0.541403
D-alanyl-D-alanine carboxypeptidase DacB	P24228	rng	64.2982	63.2619	0.0143975
Flavohemoprotein	P24232	hemY	58.4316	57.3849	0.605085
6-phospho-beta-glucosidase AscB	P24240	cpdB	55.1051	54.0526	0.0681944
Sigma factor-binding protein Crl	P24251	csdE	63.1437	62.0905	0.577822
RNA polymerase sigma-54 factor	P24255	fepB	60.2933	59.2393	0.0708986
Protease 2	P24555	nudK	61.4443	60.3779	0.404545
Tellurite methyltransferase	P25397	tehB	51.9	50.8318	0.0393962
S-(hydroxymethyl)glutathione dehydrogenase	P25437	ysgA	63.7992	62.7262	0.208878
Aconitate hydratase A	P25516	yehS	60.5723	59.4975	0.068241
GTPase HflX	P25519	rhlE	59.482	58.405	0.627652
tRNA modification GTPase MnmE	P25522	ydgA	60.5831	59.5004	0.659196
Succinate-semialdehyde dehydrogenase [NADP(+)] GabD	P25526	accC	57.1881	56.102	0.0580736
2-octaprenylphenol hydroxylase	P25535	glgB	61.7849	60.6955	0.514682
Maf-like protein YhdE	P25536	nudJ	58.8654	57.7689	0.0915479
Riboflavin biosynthesis protein RibD;Diaminohydroxyphosphoribosylaminopyrimidine deaminase;5-amino-6-(5-phosphoribosylamino)uracil reductase	P25539	mazF	66.1155	65.0187	0.256124
Guanosine-5-triphosphate,3-diphosphate pyrophosphatase	P25552	nadB	53.6828	52.5801	0.0441365
Lactaldehyde dehydrogenase	P25553	appA	64.5652	63.4598	0.0198482
5-methyltetrahydropteroyltriglutamate--homocysteine methyltransferase	P25665	iclR	63.3733	62.2641	0.125526
tRNA-specific 2-thiouridylase MnmA	P25745	yfgM	54.9636	53.8428	0.62748
ATP-dependent RNA helicase RhlE	P25888	xseA	63.4485	62.3261	0.547869
N-acetylmuramoyl-L-alanine amidase AmiB	P26365	malE	64.9811	63.856	0.329216
Chorismate pyruvate-lyase	P26602	tsaB	61.497	60.3656	0.0407338
NAD-dependent malic enzyme	P26616	purD	64.3585	63.2242	0.0798748
Probable acrylyl-CoA reductase AcuI	P26646	tolB	57.4307	56.293	0.00073565
Cell division protein FtsP	P26648	wrbA	59.5897	58.4494	0.00899454
Aminomethyltransferase	P27248	mobA	60.4395	59.2967	0.238313
Bifunctional uridylyltransferase/uridylyl-removing enzyme;[Protein-PII] uridylyltransferase;[Protein-PII]-UMP uridylyl-removing enzyme	P27249	tpiA	59.1612	58.0173	0.055707
Trifunctional NAD biosynthesis/regulator protein NadR;Transcriptional regulator NadR;Nicotinamide mononucleotide adenylyltransferase;Ribosylnicotinamide kinase	P27278	hisG	61.8491	60.7034	0.0709228
Oligopeptidase A	P27298	edd	64.3871	63.2363	0.22917
Soluble pyridine nucleotide transhydrogenase	P27306	nudE	59.1304	57.9787	0.0532405
50S ribosomal protein L16 arginine hydroxylase	P27431	crl	63.6954	62.5421	0.215526
Cytoskeleton protein RodZ	P27434	ubiC	56.0159	54.8584	0.414501
Acetyl-coenzyme A synthetase	P27550	tam	66.1706	65.0107	0.220773
UDP-N-acetylglucosamine 2-epimerase	P27828	ppsA	60.3355	59.1735	0.0162463
UDP-N-acetyl-D-mannosamine dehydrogenase	P27829	rpoC	57.2339	56.0669	0.184923
dTDP-glucose 4,6-dehydratase 2	P27830	serS	66.8465	65.6747	0.0977901
dTDP-fucosamine acetyltransferase	P27832	ybgI	56.0471	54.8714	0.0282971
dTDP-4-amino-4,6-dideoxygalactose transaminase	P27833	yihT	61.1856	60.0071	0.129849
Pyridoxal phosphate phosphatase YigL	P27848	gntK	53.3749	52.1909	0.0924302
Tat-linked quality control protein TatD	P27859	mpl	63.0072	61.8221	0.0370254
Quinone oxidoreductase 1	P28304	aceE	51.2956	50.1104	0.194306
Aminodeoxychorismate lyase	P28305	bamB	52.807	51.6194	0.673639
Probable tRNA (adenine(37)-N6)-methyltransferase	P28634	cysB	60.6911	59.5026	0.1408
D-methionine-binding lipoprotein MetQ	P28635	eptB	58.064	56.8692	0.428931
Ferredoxin--NADP reductase	P28861	carA	60.4813	59.2839	0.0735282
Anaerobic ribonucleoside-triphosphate reductase	P28903	ynhG	58.2458	57.0422	0.0118554
DNA polymerase III subunit chi	P28905	hisJ	63.9301	62.7246	0.494552
o-succinylbenzoate synthase	P29208	pykA	63.2266	62.0195	0.0264636
UPF0502 protein YceH	P29217	yeaE	52.0719	50.8622	0.0531944
Uroporphyrinogen decarboxylase	P29680	aroC	66.3249	65.1127	0.199293
Peptidase T	P29745	purH	65.216	63.9992	0.260417
Nicotinate-nucleotide pyrophosphorylase [carboxylating]	P30011	fabI	58.0566	56.8365	0.100748
Ribonuclease T	P30014	malY	61.0277	59.806	0.0444424
Probable ATP-dependent helicase lhr	P30015	purT	58.6203	57.3973	0.0012298
3-isopropylmalate dehydratase small subunit	P30126	sapA	59.1267	57.8979	0.0436125
Phosphomethylpyrimidine synthase	P30136	clpA	59.697	58.4661	0.284688
Sulfur carrier protein ThiS adenylyltransferase	P30138	fruK	65.842	64.6092	0.0369868
Uncharacterized protein YbiB	P30177	nudC	62.295	61.0529	0.370978
Uncharacterized oxidoreductase YbiC	P30178	frsA	56.5851	55.337	0.00619161
Methionine import ATP-binding protein MetN	P30750	fdhE	63.3314	62.0819	0.14727
Transcriptional regulatory protein BasR	P30843	hemN	61.8235	60.5711	0.366023
Phosphoethanolamine transferase EptA	P30845	msrC	60.7598	59.5055	0.00310888
Exoribonuclease 2	P30850	prlC	57.3431	56.0841	0.0138283
ABC transporter arginine-binding protein 1	P30860	rlmH	52.331	51.0539	0.662484
2,5-diketo-D-gluconic acid reductase B	P30863	ybhG	53.9712	52.6886	0.746539
Uncharacterized HTH-type transcriptional regulator YafC	P30864	ychF	50.0381	48.7548	0.0287193
Glutamate-ammonia-ligase adenylyltransferase	P30870	tldD	66.5328	65.2438	0.252381
Inorganic triphosphatase	P30871	ung	59.48	58.1895	0.221466
Transcription-repair-coupling factor	P30958	rsgA	60.5294	59.2281	0.30392
3-mercaptopyruvate sulfurtransferase	P31142	hisF	63.427	62.1235	0.0629746
Multidrug efflux pump subunit AcrB	P31224	mdoG	66.5576	65.2516	0.0279816
Alpha-xylosidase	P31434	ydcS	66.4002	65.0929	0.158214
Uncharacterized protein YidR	P31455	nadA	57.1412	55.8255	0.728298
Galactonate operon transcriptional repressor	P31460	miaA	56.1185	54.8026	0.128536
Deferrochelatase/peroxidase EfeB	P31545	bioD1	62.6132	61.2969	0.0756218
Pantothenate synthetase	P31663	ygfZ	58.8147	57.4944	0.184404
Alpha,alpha-trehalose-phosphate synthase [UDP-forming]	P31677	rsmE	55.9498	54.6266	0.014492
Nitrate/nitrite response regulator protein NarP	P31802	phoP	62.3872	61.0621	0.166326
Bifunctional NAD(P)H-hydrate repair enzyme Nnr;ADP-dependent (S)-NAD(P)H-hydrate dehydratase;NAD(P)H-hydrate epimerase	P31806	coaA	56.162	54.832	0.141742
Uncharacterized oxidoreductase YciK	P31808	ghrB	56.3187	54.9841	0.0830163
Probable zinc protease PqqL	P31828	phoU	57.6621	56.3172	0.430231
NADH-quinone oxidoreductase subunit F	P31979	lpxC	54.3037	52.9545	0.0850786
Oxygen-independent coproporphyrinogen-III oxidase	P32131	creB	59.4427	58.0915	0.125614
GTP-binding protein TypA/BipA	P32132	rnpA	48.5513	47.1982	0.00519849
Sulfofructosephosphate aldolase	P32141	grxB	55.047	53.6902	0.0403786
Uncharacterized HTH-type transcriptional regulator YihW	P32144	eptC	52.7816	51.4247	0.639223
Protein YiiM	P32157	ampC	65.1199	63.7612	0.233112
Uncharacterized protein YiiQ	P32160	folP	64.4327	63.0739	0.0114036
Molybdenum cofactor guanylyltransferase	P32173	pcm	52.5211	51.1573	0.119162
Phosphoglycolate phosphatase	P32662	gmk	58.6733	57.3044	0.0422565
NADH pyrophosphatase	P32664	rnr	61.1326	59.7606	0.0722512
Ribosomal large subunit pseudouridine synthase F	P32684	ptsI	59.1733	57.7933	0.0133778
tRNA-dihydrouridine synthase A	P32695	nemR	66.1213	64.739	0.609439
S-formylglutathione hydrolase YeiG	P33018	ypfJ	61.0647	59.6759	0.627287
Uncharacterized protein YeiR	P33030	sseA	59.9723	58.5792	0.0432296
Glucans biosynthesis protein G	P33136	fepC	53.6055	52.2104	0.656307
Inner membrane protein YebE	P33218	lacI	57.4078	56.0118	0.100248
Phosphoribosylglycinamide formyltransferase 2	P33221	araB	66.0894	64.6809	0.388799
Putative acyl-CoA dehydrogenase AidB	P33224	hdfR	60.0687	58.6595	0.0501391
Uncharacterized protein YehS	P33355	yegW	63.0172	61.5766	0.106673
Putative osmoprotectant uptake system substrate-binding protein OsmF	P33362	metG	56.4745	55.0318	0.00569523
Periplasmic beta-glucosidase	P33363	ligA	60.6942	59.2503	0.02464
HTH-type transcriptional regulator SgrR	P33595	srlR	65.9041	64.4597	0.287918
NADH-quinone oxidoreductase subunit C/D	P33599	acuI	59.2285	57.7824	0.00611621
NADH-quinone oxidoreductase subunit G	P33602	gatD	55.2778	53.8317	0.350647
Ribosomal large subunit pseudouridine synthase D	P33643	rffG	51.7305	50.2772	0.149934
Laccase domain protein YfiH	P33644	yiaF	56.4614	55.0031	0.69658
Putative glyceraldehyde-3-phosphate dehydrogenase C	P33898	rnc	56.4581	54.9848	0.30573
Uncharacterized protein YejA	P33913	rpoD	51.9728	50.4921	0.275916
Nucleoid-associated protein YejK	P33920	ygiS	59.6826	58.1868	0.0581301
Malate:quinone oxidoreductase	P33940	upp	65.8673	64.3512	0.132086
Alkyl hydroperoxide reductase subunit F	P35340	bioH	64.2115	62.6933	0.0713729
Oxygen-dependent coproporphyrinogen-III oxidase	P36553	ybbA	58.6084	57.0854	0.154497
Protein SmtA	P36566	entA	66.9297	65.4063	0.105959
Curved DNA-binding protein	P36659	ypdB	60.8476	59.3236	0.0886158
HTH-type transcriptional regulator TreR	P36673	mdh	66.0821	64.5561	0.0444909
Cell division protein ZapD	P36680	birA	54.747	53.2173	0.100259
Aconitate hydratase B	P36683	yhbP	54.8056	53.2694	0.168598
Recombination-associated protein RdgC	P36767	thpR	60.5308	58.9941	0.0358994
Probable HTH-type transcriptional regulator LrhA	P36771	qseB	64.8055	63.2663	0.202398
Uncharacterized ABC transporter ATP-binding protein YadG	P36879	gcd	53.5862	52.0347	0.681071
Ribosomal RNA small subunit methyltransferase B	P36929	yfbT	57.4414	55.8888	0.293632
Phosphoglucomutase	P36938	yicI	62.8815	61.3228	0.389817
Uncharacterized tRNA/rRNA methyltransferase LasT	P37005	prmA	61.4207	59.8604	0.0450175
ATP-dependent RNA helicase HrpB	P37024	rplO	50.8506	49.2877	0.55466
RNA 2,3-cyclic phosphodiesterase	P37025	pdhR	60.8783	59.3127	0.490179
Formyltetrahydrofolate deformylase	P37051	gnd	66.2946	64.7135	0.273218
Peptidase B	P37095	yegV	56.2052	54.6033	0.291802
GDP-mannose pyrophosphatase NudK	P37128	aldA	58.3979	56.7949	0.0501657
Ribonucleoside-diphosphate reductase 2 subunit beta	P37146	dhaK	61.6276	60.0102	0.0495501
Phosphoenolpyruvate-protein phosphotransferase PtsP	P37177	wecB	66.818	65.2001	0.0186048
Hydrogenase 2 maturation protease	P37182	aroD	66.5758	64.9402	0.000764619
Dipeptide transport ATP-binding protein DppF	P37313	yhhW	56.8093	55.1736	0.0154262
Malate synthase G	P37330	nanM	57.9579	56.3122	0.151905
PTS-dependent dihydroxyacetone kinase, phosphotransferase subunit DhaM;Phosphocarrier protein HPr;Phosphotransferase enzyme IIA component	P37349	ldcA	66.4038	64.7515	0.369164
D-xylose-binding periplasmic protein	P37387	carB	60.2465	58.5858	0.000509415
Oxidoreductase UcpA	P37440	ndk	51.2894	49.6221	0.148299
Alpha-ketoglutarate-dependent taurine dioxygenase	P37610	roxA	56.6489	54.9712	0.0611721
PanD maturation factor	P37613	ycjG	64.5878	62.8952	0.00241304
Uncharacterized protein YhiN	P37631	speG	66.7811	65.0875	0.336857
Ribosomal RNA large subunit methyltransferase J	P37634	ispB	58.287	56.5914	0.0744201
2-dehydro-3-deoxygluconokinase	P37647	zwf	66.0489	64.3431	0.0876989
Protein YhjJ	P37648	dkgA	60.8443	59.1238	0.000207436
Cellulose synthase operon protein C	P37650	yceM	65.7233	63.9865	0.0221052
Phosphoethanolamine transferase EptB	P37661	gcvR	53.4959	51.7537	0.432166
Glyoxylate/hydroxypyruvate reductase B	P37666	glcB	55.4255	53.6773	0.0209715
HTH-type transcriptional regulator YiaJ	P37671	recA	54.7508	52.9943	0.148937
Aldehyde dehydrogenase B	P37685	tmk	66.7375	64.9784	0.0176222
2,3-bisphosphoglycerate-independent phosphoglycerate mutase	P37689	nudF	65.9326	64.1727	0.112929
ADP-heptose--LPS heptosyltransferase 2	P37692	rdoA	66.5415	64.7787	0.035018
dTDP-glucose 4,6-dehydratase 1	P37759	argD	66.3033	64.5401	0.0231608
dTDP-4-dehydrorhamnose reductase	P37760	gpt	63.2511	61.483	0.00239225
Ribosomal large subunit pseudouridine synthase B	P37765	artJ	63.7166	61.9484	0.00483138
Uncharacterized HTH-type transcriptional regulator YfhH	P37767	mug	59.6812	57.8929	0.0243911
UDP-N-acetylmuramate--L-alanyl-gamma-D-glutamyl-meso-2,6-diaminoheptandioate ligase	P37773	nhoA	57.7717	55.9803	0.145787
Universal stress protein F	P37903	ybfF	60.4339	58.6347	0.0505438
Sulfite reductase [NADPH] flavoprotein alpha-component	P38038	ybgC	60.8402	59.0297	0.00972669
Isochorismate synthase MenF	P38051	glgP	53.3501	51.5364	0.303559
Oxygen-insensitive NAD(P)H nitroreductase	P38489	accA	63.0291	61.2046	0.0604866
NA	P39160	tatD	61.2918	59.4624	0.000808382
Uxu operon transcriptional regulator	P39161	ftsP	58.5561	56.7246	0.0247616
Putative glucose-6-phosphate 1-epimerase	P39173	gshA	57.0993	55.2562	0.00991003
Probable L,D-transpeptidase ErfK/SrfK	P39176	dapA	65.951	64.1031	0.10471
Universal stress protein G	P39177	hemE	60.7948	58.9382	0.00323244
50S ribosomal protein L3 glutamine methyltransferase	P39199	rluD	64.2524	62.3955	0.227391
D-allose-binding periplasmic protein	P39265	dxs	61.6778	59.8137	0.394805
Putative ribosome biogenesis GTPase RsgA	P39286	cysQ	64.8541	62.9889	0.0187156
Esterase YjfP	P39298	yejA	58.4807	56.5934	0.241962
Quinone oxidoreductase 2	P39315	ispE	54.0739	52.1847	0.154451
ABC transporter periplasmic-binding protein YtfQ	P39325	sufE	64.2417	62.3496	0.0490983
Uncharacterized N-acetyltransferase YjgM	P39337	lysC	60.6065	58.7031	0.000466443
Uncharacterized protein YjgR	P39342	argH	66.3829	64.4729	0.0254146
Uncharacterized protein YjhP	P39367	fabH	60.7349	58.8217	0.0274357
N-acetylneuraminate epimerase	P39371	ybdL	61.4973	59.5828	0.265949
Phosphoglycerol transferase I	P39401	deoA	57.7433	55.8278	0.000219687
Ferric iron reductase protein FhuF	P39405	zapD	58.6645	56.737	0.0474025
Ribosomal RNA small subunit methyltransferase C	P39406	gntR	65.9805	64.0323	0.0340407
Uncharacterized deoxyribonuclease YjjV	P39408	aidB	60.6098	58.6431	0.0337244
Ribonucleoside-diphosphate reductase 2 subunit alpha	P39452	yigB	52.6517	50.6809	0.055308
NADP-dependent 3-hydroxy acid dehydrogenase YdfG	P39831	ackA	66.0873	64.1095	0.0303883
Putative hydrolase YbeM	P39874	glpK	65.3784	63.3998	0.0109688
Glucans biosynthesis protein D	P40120	allR	64.9188	62.9383	0.00692051
Pyridoxine kinase	P40191	dxr	65.4019	63.4119	0.0433342
N-methyl-L-tryptophan oxidase	P40874	fadB	63.0845	61.0907	0.0043349
FMN-dependent NADH-azoreductase	P41407	ppk	54.1593	52.1429	0.0401978
Ribosomal RNA large subunit methyltransferase G	P42596	orn	63.598	61.5771	0.00582326
Altronate dehydratase	P42604	fruA	54.9421	52.9165	0.464962
Pirin-like protein YhaK	P42624	agp	65.5753	63.5109	0.0328557
PFL-like enzyme TdcE	P42632	tauD	63.3946	61.3188	0.010824
GTPase ObgE/CgtA	P42641	tas	61.6265	59.5438	0.000592471
Outer membrane usher protein YraJ	P42915	lpoB	58.9406	56.853	0.531161
ATP-dependent RNA helicase HrpA	P43329	fic	60.6552	58.5597	0.00826229
Uncharacterized NAD(P)H oxidoreductase YcaK	P43340	yigL	56.7408	54.6434	0.0167971
Paraquat-inducible protein B	P43671	rsfS	61.0857	58.9841	0.232913
Arabinose 5-phosphate isomerase KdsD	P45395	kbl	62.5311	60.4283	0.0700116
Penicillin-binding protein activator LpoA	P45464	fabR	62.0953	59.9863	0.476735
Protein TusB	P45530	priB	64.1764	62.0556	0.099629
Protein TusC	P45531	glgX	51.1505	49.0238	0.000256272
HTH-type transcriptional regulator FrlR	P45544	avtA	66.6301	64.499	0.112843
1-deoxy-D-xylulose 5-phosphate reductoisomerase	P45568	lrp	59.9712	57.8248	0.0494285
RNA chaperone ProQ	P45577	fhuF	63.4969	61.3003	0.0988334
S-ribosylhomocysteine lyase	P45578	aroF	64.4698	62.2445	0.130165
Uncharacterized oxidoreductase YbdH	P45579	ybdK	60.9716	58.738	0.108049
Threonylcarbamoyl-AMP synthase	P45748	atpA	64.3205	62.0843	0.137632
Putative amino-acid ABC transporter-binding protein YhdW	P45766	pdxK	66.6001	64.3623	0.000717576
ADP compounds hydrolase NudE	P45799	artP	51.3875	49.137	0.352209
HTH-type transcriptional regulator DsdC	P46068	ggt	65.6851	63.4335	0.0669158
Protein YhgF	P46837	apt	66.4416	64.1887	0.134048
Quercetin 2,3-dioxygenase	P46852	sdhA	61.0002	58.7469	6.81137e-06
Uncharacterized oxidoreductase YhhX	P46853	accD	63.4758	61.2215	0.00220428
Thermoresistant gluconokinase	P46859	tdh	56.7932	54.5263	0.11682
Endonuclease 8	P50465	purM	58.8078	56.5331	0.00471256
Uncharacterized protein YaiL	P51024	yajG	64.8588	62.5828	0.397488
L-Ala-D/L-Glu epimerase	P51981	queA	60.1865	57.8912	0.0153971
dITP/XTP pyrophosphatase	P52061	glxK	59.8529	57.5556	0.237287
Transcriptional regulatory protein QseB	P52076	cysP	64.9377	62.6343	0.00593551
Adenosylcobalamin/alpha-ribazole phosphatase	P52086	yeiP	59.1046	56.7841	0.290797
Lysine decarboxylase, constitutive	P52095	fpr	64.3347	62.0106	0.00234655
tRNA(Ile)-lysidine synthase	P52097	syd	63.9356	61.569	0.00373305
Transcriptional regulatory protein RstA	P52108	dhaM	57.0207	54.6432	0.00321523
Uncharacterized HTH-type transcriptional regulator YgbI	P52598	dld	60.3372	57.9576	0.333958
TDP-N-acetylfucosamine:lipid II N-acetylfucosaminyltransferase	P56258	yeiG	65.2408	62.8536	0.290002
Putative carboxymethylenebutenolidase	P56262	metN	54.7003	52.3124	0.333032
RNA polymerase-associated protein RapA	P60240	gmhA	66.1139	63.721	0.0133953
tRNA pseudouridine synthase B	P60340	rpsG	57.3252	54.917	1.34239e-05
Ribosomal RNA small subunit methyltransferase H	P60390	yceF	61.504	59.0874	0.134807
50S ribosomal protein L2	P60422	yafJ	64.913	62.4935	0.000831656
Guanylate kinase	P60546	dkgB	61.9773	59.5569	0.200822
Imidazole glycerol phosphate synthase subunit HisH	P60595	ptrB	57.1522	54.6877	0.0230501
Imidazole glycerol phosphate synthase subunit HisF	P60664	dgoD	63.2889	60.7972	0.721481
Lipoyl synthase	P60716	pepQ	58.7697	56.2646	0.00206953
Octanoyltransferase	P60720	eptA	52.0191	49.512	0.514691
50S ribosomal protein L4	P60723	bglX	59.8067	57.2928	3.74313e-05
ATP phosphoribosyltransferase	P60757	ugpQ	61.1989	58.6802	0.170715
Elongation factor 4	P60785	ybiV	60.0021	57.4767	0.0586179
Putative transport protein YidE	P60872	frmA	66.2528	63.7227	0.0423475
Histidine--tRNA ligase	P60906	atpG	65.549	63.0072	0.206318
50S ribosomal protein L22	P61175	epd	51.9466	49.3585	0.0074114
Outer-membrane lipoprotein LolB	P61320	ubiI	59.7014	57.0967	0.605076
Malate dehydrogenase	P61889	dacC	54.8549	52.2368	0.393369
50S ribosomal protein L5	P62399	yajL	64.7683	62.1189	0.00112415
4-diphosphocytidyl-2-C-methyl-D-erythritol kinase	P62615	gltD	63.3244	60.6561	0.00106652
4-hydroxy-3-methylbut-2-en-1-yl diphosphate synthase (flavodoxin)	P62620	cytR	65.2987	62.6082	0.00791511
4-hydroxy-3-methylbut-2-enyl diphosphate reductase	P62623	gloB	61.7394	59.0144	0.288999
2,3-bisphosphoglycerate-dependent phosphoglycerate mutase	P62707	adhE	58.6843	55.95	0.242101
UPF0325 protein YaeH	P62768	yhbS	57.3723	54.6162	0.0960602
23S rRNA (guanosine-2-O-)-methyltransferase RlmB	P63177	cobC	58.5121	55.7516	0.0234195
Phosphoheptose isomerase	P63224	speE	60.8095	58.0476	0.311185
D-glycero-beta-D-manno-heptose-1,7-bisphosphate 7-phosphatase	P63228	gapA	58.3791	55.6162	0.000727527
Chaperone protein ClpB	P63284;P63284-2	acrB	56.0822	53.3	0.489985
Probable phospholipid import ATP-binding protein MlaF	P63386	prkB	66.295	63.5096	0.0316254
Uncharacterized N-acetyltransferase YhbS	P63417	serA	59.0032	56.2059	0.0593384
Uncharacterized protein YpfJ	P64429	fhuA	57.2215	54.4219	0.561448
Uncharacterized lipoprotein YdcL	P64451	yidR	66.1362	63.3224	0.00818552
Uncharacterized protein YeaK	P64483	yheO	60.5438	57.718	0.0186327
Cell division protein ZapE	P64612	nuoC	63.9892	61.1424	0.337828
Uncharacterized protein YheO	P64624	menC	61.1035	58.2495	0.0142777
Uncharacterized protein YqcA	P65367	ndh	53.8732	50.9908	0.215721
Uncharacterized Nudix hydrolase YfcD	P65556	serB	65.1066	62.2209	0.0452111
Beta-barrel assembly-enhancing protease	P66948	nagE	58.3148	55.4044	0.431631
Ribosomal RNA small subunit methyltransferase I	P67087	ybgJ	61.063	58.14	0.248262
HTH-type transcriptional repressor NemR	P67430	phrB	54.9117	51.9858	0.034126
UPF0267 protein YqfB	P67603	yegQ	63.241	60.3071	0.10068
Uncharacterized HTH-type transcriptional regulator YhaJ	P67660	aspC	66.4947	63.5007	0.00231155
HTH-type transcriptional activator AaeR	P67662	ilvG	64.1708	61.1658	0.0577252
UPF0306 protein YhbP	P67762	atpD	64.3388	61.3326	0.0956193
ADP-L-glycero-D-manno-heptose-6-epimerase	P67910	tcdA	60.6823	57.577	0.00290126
Ribosomal RNA small subunit methyltransferase J	P68567	aldB	63.3712	60.219	0.0222756
Endonuclease V	P68739	ascB	51.5011	48.2949	0.0992201
50S ribosomal protein L25	P68919	gltB	66.7686	63.5518	0.0296964
Transcriptional regulatory protein BaeR	P69228	efeB	57.1504	53.9152	0.0166627
Outer membrane lipoprotein RcsF	P69411	ybgK	61.0337	57.7491	0.206111
Adenylate kinase	P69441	speF	63.6288	60.3165	0.0129657
Long-chain-fatty-acid--CoA ligase	P69451	anmK	61.9238	58.602	0.214737
Adenine phosphoribosyltransferase	P69503	lptC	58.5386	55.2002	0.254966
PTS system mannose-specific EIIAB component;Mannose-specific phosphotransferase enzyme IIA component;Mannose-specific phosphotransferase enzyme IIB component	P69797	thiF	62.1645	58.8254	0.0302077
Multiphosphoryl transfer protein;Phosphocarrier protein HPr;Fructose-specific phosphotransferase enzyme IIA component	P69811	dcp	58.6203	55.2791	0.000852943
Nitrogen regulatory protein	P69829	ygiN	66.1817	62.7783	0.00204069
Spermidine/putrescine import ATP-binding protein PotA	P69874	gss	61.8103	58.394	5.13855e-05
DnaA regulatory inactivator Hda	P69931	pqiB	56.0103	52.564	0.28894
Aldehyde reductase YahK	P75691	ltaE	58.2263	54.7604	0.0213334
Citrate lyase alpha chain	P75726	relA	57.2547	53.7835	0.0027811
Esterase YbfF	P75736	pabA	61.1693	57.6626	0.00871988
Uncharacterized protein YbgK	P75745	yjfP	63.8594	60.3394	0.000355077
UPF0194 membrane protein YbhG	P75777	ispH	64.1692	60.6216	0.0670735
Sugar phosphatase YbiV	P75792	lsrF	62.0492	58.4995	0.246968
Glutathione import ATP-binding protein GsiA	P75796	talB	62.2439	58.6819	0.00518974
Uncharacterized protein YbjS	P75821	entE	57.5275	53.9537	0.000532623
Low specificity L-threonine aldolase	P75823	yegS	60.0968	56.4757	0.0313887
Uncharacterized protein YbjD	P75828	murG	53.6519	50.0137	0.0428876
Ribosomal protein S12 methylthiotransferase accessory factor YcaO	P75838	yiiD	52.0828	48.4401	0.275746
Uncharacterized protein YcbL	P75849	rplA	64.2527	60.6024	0.0646192
Uncharacterized protein YcbX	P75863	cmoA	65.557	61.8871	0.0295382
Ribosomal RNA large subunit methyltransferase K/L;23S rRNA m2G2445 methyltransferase;23S rRNA m7G2069 methyltransferase	P75864	asnB	54.7677	51.0812	0.000811458
Uncharacterized protein YccU	P75874	arnA	50.8965	47.1339	0.092345
Ribosomal RNA large subunit methyltransferase I	P75876	ilvY	59.3713	55.6059	0.0120061
Glyoxylate/hydroxypyruvate reductase A	P75913	fumA	57.5341	53.7663	0.00300632
Putative oxidoreductase YceM	P75931	pdxB	61.316	57.5437	0.000143359
Beta-hexosaminidase	P75949	pmbA	64.3345	60.4902	0.000183211
HTH-type transcriptional repressor ComR	P75952	yeaK	61.9479	58.0632	0.0519735
Murein tetrapeptide carboxypeptidase	P76008	purU	59.3558	55.4668	0.00102128
PTS-dependent dihydroxyacetone kinase, ADP-binding subunit DhaL	P76014	entH	60.7306	56.7926	0.0372972
PTS-dependent dihydroxyacetone kinase, dihydroxyacetone-binding subunit DhaK	P76015	sucB	66.3529	62.4117	0.0001547
Uncharacterized HTH-type transcriptional regulator YciT	P76034	recC	55.6009	51.5892	0.524591
Uncharacterized protein YcjX	P76046	znuC	55.9352	51.9113	0.306472
Uncharacterized protein YcjY	P76049	yqhC	58.5898	54.5547	0.0286408
Putative ABC transporter periplasmic-binding protein YdcS	P76108	ilvI	63.2088	59.1177	0.036111
L-amino acid N-acyltransferase MnaT	P76112	ytfL	59.155	55.0291	0.436686
NADPH-dependent curcumin reductase	P76113	nrdD	57.0127	52.8658	0.0204716
Uncharacterized protein YncE	P76116	iscS	60.1381	55.9522	0.00272409
Probable D,D-dipeptide-binding periplasmic protein DdpA	P76128	maeA	55.5232	51.3298	1.63433e-05
Autoinducer 2-binding protein LsrB	P76142	livF	51.6082	47.3786	0.0935831
Uncharacterized aldolase LsrF	P76143	secD	60.3437	56.0295	0.20766
Trans-aconitate 2-methyltransferase	P76145	trpE	55.6233	51.2895	0.000921292
Succinate semialdehyde dehydrogenase [NAD(P)+] Sad	P76149	poxB	64.5093	60.1661	0.0151542
Uncharacterized serine protease YdgD	P76176	yciO	65.8777	61.4952	0.293211
Protein YdgH	P76177	ppsR	51.895	47.4487	2.03564e-05
Oxidoreductase YdhF	P76187	menD	63.4277	58.9381	0.0765661
NA	P76193	nemA	60.8049	56.2883	0.254476
Cysteine desulfuration protein SufE	P76194	murC	56.8296	52.3086	0.056257
N-succinylarginine dihydrolase	P76216	tufB;tufA	57.71	53.1834	0.00469275
Protein YnjB	P76223	nagZ	60.0804	55.5373	0.00102303
Uncharacterized protein YeaE	P76234	mtnN	65.4342	60.8904	0.00230469
D-malate dehydrogenase [decarboxylating]	P76251	astB	62.2584	57.6572	0.00108219
tRNA threonylcarbamoyladenosine biosynthesis protein TsaB	P76256	yfeR	62.6526	57.9164	0.0185945
Transcriptional regulator KdgR	P76268	lptE	54.4274	49.6695	0.443733
Free methionine-R-sulfoxide reductase	P76270	mqsA	63.9685	59.1197	0.0112706
Ribosomal RNA small subunit methyltransferase F	P76273	pgm	63.1598	58.2562	2.7237e-05
tRNA (cmo5U34)-methyltransferase	P76290	gapC	65.6149	60.6558	0.00167317
tRNA (mo5U34)-methyltransferase	P76291	leuD	60.6196	55.5316	0.0086435
Sulfoxide reductase catalytic subunit YedY	P76342	lolB	63.2417	58.1516	0.0322146
UDP-glucose 6-dehydrogenase	P76373	ugd	55.1064	50.0114	0.0230928
UPF0339 protein YegP	P76402	apaH	61.5157	56.4024	0.00138548
Uncharacterized protease YegQ	P76403	dsdC	62.3853	57.2267	0.0152296
Lipid kinase YegS	P76407	rodZ	64.6921	59.4957	0.0425414
Uncharacterized protein YegU	P76418	queC	63.4174	58.1349	0.000146254
Uncharacterized sugar kinase YegV	P76419	mnaT	59.1276	53.7338	0.0955649
Hydroxymethylpyrimidine/phosphomethylpyrimidine kinase	P76422	uxuR	60.2656	54.8675	0.0777422
Undecaprenyl phosphate-alpha-4-amino-4-deoxy-L-arabinose arabinosyl transferase	P76473	oppA	65.675	60.2585	0.000602996
N-acetylmuramic acid 6-phosphate etherase	P76535	thrC	58.9616	53.5436	0.00277335
Probable deferrochelatase/peroxidase YfeX	P76536	pflA	58.6165	53.0327	0.163015
UPF0070 protein YfgM	P76576	ydcL	66.8009	61.209	0.0895648
Uncharacterized lipoprotein YfhM	P76578	fepA	53.293	47.6759	0.141443
Protein lysine acetyltransferase Pka	P76594	selB	58.5176	52.8872	0.0802321
Bifunctional protein HldE;D-beta-D-heptose 7-phosphate kinase;D-beta-D-heptose 1-phosphate adenylyltransferase	P76658	mutM	63.471	57.8309	0.00946496
2-hydroxy-6-oxononadienedioate/2-hydroxy-6-oxononatrienedioate hydrolase	P77044	alaC	66.3399	60.653	0.000394248
Uncharacterized protein YdhS	P77148	fbp	58.9779	53.2616	7.1696e-05
tRNA 5-methylaminomethyl-2-thiouridine biosynthesis bifunctional protein MnmC;tRNA (mnm(5)s(2)U34)-methyltransferase;FAD-dependent cmnm(5)s(2)U34 oxidoreductase	P77182	bioF	60.4303	54.6787	0.127958
Thiol:disulfide interchange protein DsbG	P77202	leuC	57.7879	51.705	0.020606
Probable pyridine nucleotide-disulfide oxidoreductase RclA	P77212	ilvA	61.1657	54.886	0.000139565
Putative glutamate--cysteine ligase 2	P77213	acnB	56.6838	50.1598	8.10786e-05
Cation efflux system protein CusB	P77239	hisP	62.7748	56.2392	0.00926065
N-ethylmaleimide reductase	P77258	hmp	63.2826	56.5891	0.0298798
Uncharacterized sulfatase YdeN	P77318	glpX	60.8713	54.0298	0.0578113
Periplasmic murein peptide-binding protein	P77348	alr	61.2436	54.3546	6.57929e-05
Glycerate kinase	P77364	rfbD	57.2891	50.3666	0.00118344
Bifunctional polymyxin resistance protein ArnA;UDP-4-amino-4-deoxy-L-arabinose formyltransferase;UDP-glucuronic acid oxidase, UDP-4-keto-hexauronic acid decarboxylating	P77398	metF	52.7999	45.7748	0.00375639
Glutamate-pyruvate aminotransferase AlaC	P77434	trpGD	58.3948	51.323	5.80406e-05
1-deoxy-D-xylulose-5-phosphate synthase	P77488	hsdR	56.5918	49.4606	0.0725018
Probable ATP-dependent transporter SufC	P77499	mreB	57.5485	50.2655	0.00120699
Glutathione S-transferase YfcF	P77544	lipA	59.6845	52.396	0.0246608
Uncharacterized protein YahJ	P77554	cysH	61.7134	54.3574	0.0303417
Uncharacterized HTH-type transcriptional regulator YnfL	P77559	aroB	60.1877	52.6986	6.81387e-05
N-hydroxyarylamine O-acetyltransferase	P77567	fes	56.0447	48.535	0.00208077
Anhydro-N-acetylmuramic acid kinase	P77570	thrA	56.6143	49.0077	0.0476169
Uncharacterized HTH-type transcriptional regulator YcjW	P77615	ydhS	58.57	50.9456	3.71667e-05
Sugar phosphatase YfbT	P77625	fre	56.9937	49.2371	0.00263252
tRNA sulfurtransferase	P77718	frdA	64.6585	56.8814	0.00744683
Uncharacterized oxidoreductase YajO	P77735	thiD	64.3386	56.4569	0.0219246
Uncharacterized protein YniA	P77739	hrpB	60.4384	52.4851	0.0505507
7-cyano-7-deazaguanine synthase	P77756	ycfP	56.2029	48.111	0.0283109
Outer membrane protein assembly factor BamB	P77774	ispG	62.3864	54.229	0.00604981
Epimerase family protein YfcH	P77775	selD	61.8255	53.5962	0.0521563
Protein YdgA	P77804	cysI	62.9216	54.4005	0.0026968
Methionine aminotransferase	P77806	add	57.7516	49.2012	0.0248935
NMN amidohydrolase-like protein YfaY	P77808	hemG	63.391	54.6635	0.0279481
Thiosulfate sulfurtransferase YnjE	P78067	metA	57.404	48.6371	0.0260786
50S ribosomal protein L36 2	Q2EEQ2	metE	60.8569	51.7909	0.0124446
Uncharacterized protein YibT	Q2M7R5	btuE	59.2075	50.1373	0.00575617
6-phospho-beta-glucosidase BglA	Q46829	thiL	64.2835	54.9629	0.00501324
Uncharacterized HTH-type transcriptional regulator YqhC	Q46855	ybdH	63.3919	53.9407	0.000125154
Alcohol dehydrogenase YqhD	Q46856	yhbW	57.7208	47.8172	0.0123427
2,5-diketo-D-gluconic acid reductase A	Q46857	otsA	66.2399	56.3131	2.08187e-05
Probable deoxycholate-binding periplasmic protein YgiS	Q46863	ybiC	59.2471	49.244	7.45206e-05
Antitoxin MqsA	Q46864	cysJ	61.6397	51.5852	0.00180567
Uncharacterized protein YqcC	Q46919	entB	63.525	53.0171	0.00165185
tRNA threonylcarbamoyladenosine dehydratase	Q46927	yrdA	62.116	51.5393	0.000464487
Probable protein deglycase	Q46948	alaA	60.7067	49.9483	0.00238334
Putative glutamine amidotransferase YafJ	Q47147	asnA	63.8411	52.3121	0.000144239
Taurine-binding periplasmic protein	Q47537	metH	59.3061	47.4685	0.0226299
Peptide transport periplasmic protein SapA	Q47622	yafV	62.7949	50.7473	0.000108897
Hydrolase YafV	Q47679	ilvD	65.6775	53.6076	0.0606614
tRNA pseudouridine synthase D	Q57261	gsk	61.4857	49.0334	4.90727e-05
D-galactonate dehydratase	Q6BF17	ftsA	62.3117	49.1338	0.00378822
ADP-ribose pyrophosphatase	Q93K97	ilvB	65.9885	49.5208	1.05708e-05
